# Supplementary material for: Imaging tissues and cells beyond the diffraction limit with structured illumination microscopy and Bayesian image reconstruction
Source: PubMed Central journal article supplement (PMC6325271; doi:10.1093/gigascience/giy126), 2018-08-23

## Imaging tissues and cells beyond the diffraction limit with structured illumination microscopy and Bayesian image reconstruction --Manuscript Draft--

|                                                      |                                                                                                                                                                                                                                                                                                                                                                                                                                                                                                                                                                                                                                                                                                                                                                                                                                                                                                                                                                                                                                                                                                                                                                                                                                                                                                                                                                                                                                                                                                                                                                                                                                                                                                                                                 |                  |
|------------------------------------------------------|-------------------------------------------------------------------------------------------------------------------------------------------------------------------------------------------------------------------------------------------------------------------------------------------------------------------------------------------------------------------------------------------------------------------------------------------------------------------------------------------------------------------------------------------------------------------------------------------------------------------------------------------------------------------------------------------------------------------------------------------------------------------------------------------------------------------------------------------------------------------------------------------------------------------------------------------------------------------------------------------------------------------------------------------------------------------------------------------------------------------------------------------------------------------------------------------------------------------------------------------------------------------------------------------------------------------------------------------------------------------------------------------------------------------------------------------------------------------------------------------------------------------------------------------------------------------------------------------------------------------------------------------------------------------------------------------------------------------------------------------------|------------------|
| <b>Manuscript Number:</b>                            | GIGA-D-18-00276                                                                                                                                                                                                                                                                                                                                                                                                                                                                                                                                                                                                                                                                                                                                                                                                                                                                                                                                                                                                                                                                                                                                                                                                                                                                                                                                                                                                                                                                                                                                                                                                                                                                                                                                 |                  |
| <b>Full Title:</b>                                   | Imaging tissues and cells beyond the diffraction limit with structured illumination microscopy and Bayesian image reconstruction                                                                                                                                                                                                                                                                                                                                                                                                                                                                                                                                                                                                                                                                                                                                                                                                                                                                                                                                                                                                                                                                                                                                                                                                                                                                                                                                                                                                                                                                                                                                                                                                                |                  |
| <b>Article Type:</b>                                 | Data Note                                                                                                                                                                                                                                                                                                                                                                                                                                                                                                                                                                                                                                                                                                                                                                                                                                                                                                                                                                                                                                                                                                                                                                                                                                                                                                                                                                                                                                                                                                                                                                                                                                                                                                                                       |                  |
| <b>Funding Information:</b>                          | National Institute of General Medical Sciences (1R15GM128166-01)                                                                                                                                                                                                                                                                                                                                                                                                                                                                                                                                                                                                                                                                                                                                                                                                                                                                                                                                                                                                                                                                                                                                                                                                                                                                                                                                                                                                                                                                                                                                                                                                                                                                                | Dr Guy Hagen     |
|                                                      | National Science Foundation (1727033)                                                                                                                                                                                                                                                                                                                                                                                                                                                                                                                                                                                                                                                                                                                                                                                                                                                                                                                                                                                                                                                                                                                                                                                                                                                                                                                                                                                                                                                                                                                                                                                                                                                                                                           | Dr Guy Hagen     |
|                                                      | SCIEX (13.183)                                                                                                                                                                                                                                                                                                                                                                                                                                                                                                                                                                                                                                                                                                                                                                                                                                                                                                                                                                                                                                                                                                                                                                                                                                                                                                                                                                                                                                                                                                                                                                                                                                                                                                                                  | Dr Tomáš Lukeš   |
|                                                      | České Vysoké Učení Technické v Praze (SGS18/141/OHK3/2T/13)                                                                                                                                                                                                                                                                                                                                                                                                                                                                                                                                                                                                                                                                                                                                                                                                                                                                                                                                                                                                                                                                                                                                                                                                                                                                                                                                                                                                                                                                                                                                                                                                                                                                                     | Dr Karel Fliegel |
|                                                      | BioFrontiers Institute, University of Colorado Colorado Springs                                                                                                                                                                                                                                                                                                                                                                                                                                                                                                                                                                                                                                                                                                                                                                                                                                                                                                                                                                                                                                                                                                                                                                                                                                                                                                                                                                                                                                                                                                                                                                                                                                                                                 | Dr Guy Hagen     |
| <b>Abstract:</b>                                     | <p><b>Background</b></p> <p>Structured illumination microscopy (SIM) is a family of methods in optical fluorescence microscopy that can achieve both optical sectioning and super-resolution effects. SIM is a valuable method for high resolution imaging of fixed cells or tissues labeled with conventional fluorophores, as well as for imaging the dynamics of live cells expressing fluorescent protein constructs. In SIM, one acquires a set of images with shifting illumination patterns. This set of images is subsequently treated with image analysis algorithms to produce an image with reduced out-of-focus light (optical sectioning) and/or with improved resolution (super-resolution).</p> <p><b>Findings</b></p> <p>Five complete, freely available SIM datasets are presented including raw and analyzed data. We report methods for image acquisition and analysis using open source software along with examples of the resulting images when processed with different methods. We processed the data using established optical sectioning SIM and super-resolution SIM methods, and with newer Bayesian restoration approaches which we are developing.</p> <p><b>Conclusion</b></p> <p>Various methods for SIM data acquisition and processing are actively being developed, but complete raw data from SIM experiments is not typically published. Publicly available, high quality raw data with examples of processed results will aid researchers when developing new methods in SIM. Biologists will also find interest in the high-resolution images of animal tissues and cells we acquired. All of the data was processed with SIMToolbox, an open source and freely available software solution for SIM.</p> |                  |
| <b>Corresponding Author:</b>                         | Guy Hagen<br><br>UNITED STATES                                                                                                                                                                                                                                                                                                                                                                                                                                                                                                                                                                                                                                                                                                                                                                                                                                                                                                                                                                                                                                                                                                                                                                                                                                                                                                                                                                                                                                                                                                                                                                                                                                                                                                                  |                  |
| <b>Corresponding Author Secondary Information:</b>   |                                                                                                                                                                                                                                                                                                                                                                                                                                                                                                                                                                                                                                                                                                                                                                                                                                                                                                                                                                                                                                                                                                                                                                                                                                                                                                                                                                                                                                                                                                                                                                                                                                                                                                                                                 |                  |
| <b>Corresponding Author's Institution:</b>           |                                                                                                                                                                                                                                                                                                                                                                                                                                                                                                                                                                                                                                                                                                                                                                                                                                                                                                                                                                                                                                                                                                                                                                                                                                                                                                                                                                                                                                                                                                                                                                                                                                                                                                                                                 |                  |
| <b>Corresponding Author's Secondary Institution:</b> |                                                                                                                                                                                                                                                                                                                                                                                                                                                                                                                                                                                                                                                                                                                                                                                                                                                                                                                                                                                                                                                                                                                                                                                                                                                                                                                                                                                                                                                                                                                                                                                                                                                                                                                                                 |                  |

|                                                                                                                                                                                                                                                                                                                                                                                                                                                                                                                                     |                  |
|-------------------------------------------------------------------------------------------------------------------------------------------------------------------------------------------------------------------------------------------------------------------------------------------------------------------------------------------------------------------------------------------------------------------------------------------------------------------------------------------------------------------------------------|------------------|
| <b>First Author:</b>                                                                                                                                                                                                                                                                                                                                                                                                                                                                                                                | Jakub Pospíšil   |
| <b>First Author Secondary Information:</b>                                                                                                                                                                                                                                                                                                                                                                                                                                                                                          |                  |
| <b>Order of Authors:</b>                                                                                                                                                                                                                                                                                                                                                                                                                                                                                                            | Jakub Pospíšil   |
|                                                                                                                                                                                                                                                                                                                                                                                                                                                                                                                                     | Tomáš Lukeš      |
|                                                                                                                                                                                                                                                                                                                                                                                                                                                                                                                                     | Justin Bendesky  |
|                                                                                                                                                                                                                                                                                                                                                                                                                                                                                                                                     | Karel Fliegel    |
|                                                                                                                                                                                                                                                                                                                                                                                                                                                                                                                                     | Kathrin Spendier |
|                                                                                                                                                                                                                                                                                                                                                                                                                                                                                                                                     | Guy Hagen        |
| <b>Order of Authors Secondary Information:</b>                                                                                                                                                                                                                                                                                                                                                                                                                                                                                      |                  |
| <b>Additional Information:</b>                                                                                                                                                                                                                                                                                                                                                                                                                                                                                                      |                  |
| <b>Question</b>                                                                                                                                                                                                                                                                                                                                                                                                                                                                                                                     | <b>Response</b>  |
| Are you submitting this manuscript to a special series or article collection?                                                                                                                                                                                                                                                                                                                                                                                                                                                       | No               |
| <p><b>Experimental design and statistics</b></p> <p>Full details of the experimental design and statistical methods used should be given in the Methods section, as detailed in our <a href="#">Minimum Standards Reporting Checklist</a>. Information essential to interpreting the data presented should be made available in the figure legends.</p> <p>Have you included all the information requested in your manuscript?</p>                                                                                                  | Yes              |
| <p><b>Resources</b></p> <p>A description of all resources used, including antibodies, cell lines, animals and software tools, with enough information to allow them to be uniquely identified, should be included in the Methods section. Authors are strongly encouraged to cite <a href="#">Research Resource Identifiers</a> (RRIDs) for antibodies, model organisms and tools, where possible.</p> <p>Have you included the information requested as detailed in our <a href="#">Minimum Standards Reporting Checklist</a>?</p> | Yes              |
| <b>Availability of data and materials</b>                                                                                                                                                                                                                                                                                                                                                                                                                                                                                           | No               |

|                                                                                                                                                                                                                                                                                                                                                                                                                                                                                                                                                                                                                                               |                                                                                            |
|-----------------------------------------------------------------------------------------------------------------------------------------------------------------------------------------------------------------------------------------------------------------------------------------------------------------------------------------------------------------------------------------------------------------------------------------------------------------------------------------------------------------------------------------------------------------------------------------------------------------------------------------------|--------------------------------------------------------------------------------------------|
| <p>All datasets and code on which the conclusions of the paper rely must be either included in your submission or deposited in <a href="#">publicly available repositories</a> (where available and ethically appropriate), referencing such data using a unique identifier in the references and in the “Availability of Data and Materials” section of your manuscript.</p> <p>Have you have met the above requirement as detailed in our <a href="#">Minimum Standards Reporting Checklist</a>?</p>                                                                                                                                        |                                                                                            |
| <p>If not, please give reasons for any omissions below.</p> <p>as follow-up to "<b>Availability of data and materials</b></p> <p>All datasets and code on which the conclusions of the paper rely must be either included in your submission or deposited in <a href="#">publicly available repositories</a> (where available and ethically appropriate), referencing such data using a unique identifier in the references and in the “Availability of Data and Materials” section of your manuscript.</p> <p>Have you have met the above requirement as detailed in our <a href="#">Minimum Standards Reporting Checklist</a>?</p> <p>"</p> | <p>we plan to upload the data to GIGA DB when we are contacted by the Gigascience team</p> |

1  
2  
3  
4 **1 Imaging tissues and cells beyond the diffraction limit with structured illumination microscopy**  
5  
6 **2 and Bayesian image reconstruction**  
7

8  
9 **3 Jakub Pospíšil<sup>1</sup>, Tomáš Lukeš<sup>1,2</sup>, Justin Bendesky<sup>3</sup>, Karel Fliegel<sup>1</sup>, Kathrin Spendier<sup>3,4</sup>, and**  
10  
11 **4 Guy M. Hagen<sup>3\*</sup>**  
12

13  
14 <sup>1</sup>Department of Radioelectronics, Faculty of Electrical Engineering, Czech Technical University in Prague,  
15  
16 Technická 2, 16627 Prague 6, Czech Republic.  
17

18 <sup>2</sup>Laboratory of Nanoscale Biology, École Polytechnique Fédérale de Lausanne, CH-1015 Lausanne,  
19  
20 Switzerland.  
21

22 <sup>3</sup>UCCS center for the Biofrontiers Institute, University of Colorado at Colorado Springs, 1420 Austin  
23  
24 Bluffs Parkway, Colorado Springs, Colorado, 80918, USA.  
25

26  
27 <sup>4</sup>Department of Physics and Energy Science, University of Colorado at Colorado Springs, 1420 Austin  
28  
29 Bluffs Parkway, Colorado Springs, Colorado, 80918, USA.  
30

31 **13 Contact email addresses**  
32

33  
34 Jakub Pospíšil, [pospij27@fel.cvut.cz](mailto:pospij27@fel.cvut.cz)  
35

36 15 Tomáš Lukeš [lukestom@fel.cvut.cz](mailto:lukestom@fel.cvut.cz)  
37

38 16 Justin Bendesky [jbendesk@uccs.edu](mailto:jbendesk@uccs.edu)  
39

40 17 Karel Fliegel, [fliegek@fel.cvut.cz](mailto:fliegek@fel.cvut.cz)  
41

42 18 Kathrin Spendier, [kspendie@uccs.edu](mailto:kspendie@uccs.edu)  
43

44  
45 Corresponding author, Guy M. Hagen, [ghagen@uccs.edu](mailto:ghagen@uccs.edu)  
46

47 **20 Abstract**  
48

49 **21 Background:** Structured illumination microscopy (SIM) is a family of methods in optical fluorescence  
50  
51 microscopy that can achieve both optical sectioning and super-resolution effects. SIM is a valuable method  
52  
53 for high resolution imaging of fixed cells or tissues labeled with conventional fluorophores, as well as for  
54  
55 imaging the dynamics of live cells expressing fluorescent protein constructs. In SIM, one acquires a set of  
56  
57 images with shifting illumination patterns. This set of images is subsequently treated with image analysis  
58  
59  
60  
61  
62  
63  
64  
65

1  
2  
3  
4  
5  
6  
7  
8  
9  
10  
11  
12  
13  
14  
15  
16  
17  
18  
19  
20  
21  
22  
23  
24  
25  
26  
27  
28  
29  
30  
31  
32  
33  
34  
35  
36  
37  
38  
39  
40  
41  
42  
43  
44  
45  
46  
47  
48  
49  
50  
51  
52  
53  
54  
55  
56  
57  
58  
59  
60  
61  
62  
63  
64  
65

26 algorithms to produce an image with reduced out-of-focus light (optical sectioning) and/or with improved  
27 resolution (super-resolution).

28 **Findings:** Five complete, freely available SIM datasets are presented including raw and analyzed data. We  
29 report methods for image acquisition and analysis using open source software along with examples of the  
30 resulting images when processed with different methods. We processed the data using established optical  
31 sectioning SIM and super-resolution SIM methods, and with newer Bayesian restoration approaches which  
32 we are developing.

33 **Conclusion:** Various methods for SIM data acquisition and processing are actively being developed, but  
34 complete raw data from SIM experiments is not typically published. Publically available, high quality raw  
35 data with examples of processed results will aid researchers when developing new methods in SIM.  
36 Biologists will also find interest in the high-resolution images of animal tissues and cells we acquired. All  
37 of the data was processed with SIMToolbox, an open source and freely available software solution for  
38 SIM.

39 **Keywords:** super-resolution microscopy, SIMToolbox, structured illumination microscopy, open-source  
40 software, fluorescence, Bayesian methods, LAMP1, live cell imaging.

### 41 **Data description**

#### 42 **Context**

43 Several methods are now available which are able to extend the resolution of fluorescence microscopy  
44 beyond the diffraction limit. These methods include photoactivated localization microscopy [1,2] (PALM,  
45 FPALM), stochastic optical reconstruction microscopy [3,4] (STORM, dSTORM), super-resolution  
46 optical fluctuation imaging [5,6] (SOFI), stimulated emission depletion microscopy [7] (STED), and  
47 structured illumination microscopy [8,9] (SIM).

48 Of these various methods, SIM is usually regarded as the most useful for imaging live cells, and  
49 this method has rapidly gained in popularity. Depending on the optical setup and data processing method  
50 used, SIM can achieve optical sectioning (OS-SIM) [10], an effect which greatly reduces out-of-focus light

1  
2  
3  
4  
5  
6  
7  
8  
9  
10  
11  
12  
13  
14  
15  
16  
17  
18  
19  
20  
21  
22  
23  
24  
25  
26  
27  
28  
29  
30  
31  
32  
33  
34  
35  
36  
37  
38  
39  
40  
41  
42  
43  
44  
45  
46  
47  
48  
49  
50  
51  
52  
53  
54  
55  
56  
57  
58  
59  
60  
61  
62  
63  
64  
65

51 similar to laser scanning confocal fluorescence microscopy. SIM can also be used for imaging beyond the  
52 diffraction limit in fluorescence microscopy. Super-resolution SIM (SR-SIM) [8,9], in its most common  
53 implementation [11], uses laser illumination to create a high frequency interference fringe pattern (close to  
54 or at the resolution limit of the microscope) to illuminate the sample. In such an experiment, image  
55 information with details beyond the limit of spatial frequencies accepted by the microscope is aliased into  
56 the acquired images. By acquiring multiple images with shifting illumination patterns, a high-resolution  
57 image can be reconstructed [8,9]. Two-dimensional SR-SIM enables a twofold resolution improvement in  
58 the lateral dimension [8,9,12,13]. If a three-dimensional illumination pattern is used, a twofold resolution  
59 improvement can also be realized in the axial direction [11,14,15]. SIM is perhaps the most attractive  
60 super-resolution method for imaging live cells because it does not require high illumination powers, can  
61 work with most dyes and fluorescent proteins, uses efficient widefield (WF) detection, and can achieve  
62 high imaging rates. SIM has been demonstrated in several applications, including 2D [12,13], and 3D  
63 imaging [14,16].

64 As interest in super-resolution imaging has increased, several alternative approaches for SIM have  
65 been introduced which use various kinds of patterned illumination [17–21]. For example, in multifocal  
66 structured illumination microscopy (MSIM) [17], a 2D array of focused laser spots is scanned across a  
67 sample, and subsequent image processing is used to achieve an image with improved resolution. Structured  
68 illumination methods have also been combined with light sheet excitation, a method ideal for imaging live  
69 cells [22–26].

70 In addition to new illumination schemes, alternative data processing methods have also been  
71 introduced [27–33]. For example, Orioux et al. suggested a 2D method for SIM reconstruction based on  
72 Bayesian estimation [28], and our group showed that Bayesian reconstruction methods in SIM have several  
73 potential advantages and can achieve a performance comparable to traditional SIM methods [29]. To allow  
74 3D imaging, our group subsequently introduced maximum *a posteriori* probability SIM (MAP-SIM [30]),  
75 a method based on reconstruction of the SIM data using a Bayesian framework. Image restoration

1  
2  
3  
4 76 approaches are useful when working with low signal levels in SIM [34], and have been recently  
5  
6  
7 77 reviewed [35].  
8

9 78 We present complete raw and analyzed SIM data from several different situations in cell biology  
10  
11 79 studies in which we imaged both live and fixed mammalian cells as well as fixed tissues. We used an  
12  
13 80 alternative approach for SIM illumination which has been previously described [30,36,37]. Our system  
14  
15 81 uses either light emitting diode (LED) or laser illumination, and a fast ferroelectric liquid crystal-on-silicon  
16  
17 82 (FLCOS) microdisplay (also known as a spatial light modulator (SLM)) for SIM pattern definition. SLMs  
18  
19 83 have seen use in SIM and related applications when high speed imaging and flexibility in controlling the  
20  
21 84 spatial and temporal properties of the illumination are priorities [12,13,42,43,14,16,25,37–41]. To analyze  
22  
23 85 the data we used OS-SIM, SR-SIM, and MAP-SIM methods. All of the raw and analyzed data are available  
24  
25 86 on GigaDB, and the analysis software (SIMToolbox) is open-source and freely available [36].  
26  
27  
28

## 29 87 **Methods**

### 30 31 88 *Cell lines and reagents*

32  
33 89 All cell lines used were maintained in DMEM supplemented with 10 % FCS, 100 U/ml penicillin, 100  
34  
35 90 U/ml streptomycin, and L-glutamate (Invitrogen) at 37 °C and 100% humidity. Cell lines we used for this  
36  
37 91 study included U2-OS (human bone sarcoma), A431 (human skin carcinoma), and Hep-G2 (human liver  
38  
39 92 carcinoma).  
40

### 41 42 93 *Preparation of samples for imaging*

43  
44 94 (SIM data 1, Fig. 4) U2-OS cells expressing lysosome-associated membrane protein 1 labeled with green  
45  
46 95 fluorescent protein (LAMP1-GFP) were grown in petri dishes with coverslip bottoms (MatTek) for 24  
47  
48 96 hours, then imaged them in full medium at room temperature. In this experiment, we used microscopy  
49  
50 97 system 1 (Olympus IX71, Table 2).  
51  
52

53 98  
54  
55 99 (SIM data 2, Fig. 5) A431 cells were grown on #1.5H coverslips (Marienfeld) for 48 hours in  
56  
57 100 normal medium. We washed the cells once with phosphate buffered saline (PBS), pH 7.4, and then treated  
58  
59  
60  
61  
62  
63  
64  
65

1  
2  
3  
4  
5 101 the cells with 1 mM DiI-C<sub>16</sub> (Molecular Probes) in PBS at room temperature for 5 minutes. This probe is  
6  
7 102 a lipid modified with a fluorescent dye that inserts into the plasma membrane of live mammalian cells  
8  
9 103 within a few minutes. We then washed the cells twice with PBS, then imaged them on the SIM system in  
10  
11 104 fresh PBS at room temperature using a coverslip chamber (Biotech). In this experiment, we used  
12  
13 105 microscopy system 3 (Leica DMI8, Table 2).

15  
16 106 (SIM data 3, Fig. 6) A prepared slide was acquired (AmScope) containing sectioned rabbit testis  
17  
18 107 stained with hematoxylin and eosin (H&E). In this experiment, we used microscopy system 3 (Leica DMI8,  
19  
20 108 described below).

22 109 (SIM data 4, Fig. 7) Hep-G2 cells expressing Dendra2-histone 4 [44] were grown on #1.5H  
23  
24 110 coverslips for 24 hours, then fixed for 15 minutes at room temperature with 4% paraformaldehyde. We  
25  
26 111 then permeabilized the cells for 5 minutes at room temperature with 0.1% triton-X100, then washed the  
27  
28 112 cells with PBS. We then labeled the actin cytoskeleton of the cells for 1 hour at room temperature with 5  
29  
30 113 nM Atto 565 phalloidin, followed by washing the cells with PBS. We finally mounted the coverslips on  
31  
32 114 clean cells using mowiol 4-88 (Fluka). In this experiment, we used microscopy system 1 (Olympus IX71,  
33  
34 115 Table 2).

38 116 (SIM data 5, Fig. 8) A prepared slide was acquired (Molecular Probes) containing bovine  
39  
40 117 pulmonary endothelial (BPAE) cells stained with Alexa Fluor 488 phalloidin (to label the actin  
41  
42 118 cytoskeleton) and Mitotracker CMXRos (to label mitochondria). In this experiment, we used microscopy  
43  
44 119 system 2 (Olympus IX83, Table 2).

46  
47 120 Table 1 summarizes the imaging parameters used for the different samples.

#### 49 121 *Microscope setup and acquisition*

51 122 We used three different home-built SIM setups based on the same general design as described  
52  
53 123 previously [30,36,37] (Figure 1). The three SIM systems were based on Olympus IX71, Olympus IX83,  
54  
55 124 and Leica DMI8 microscopes coupled with sCMOS cameras (Andor) under the control of IQ3 software  
56  
57 125 (Andor). The parameters of the different microscope setups are shown in table 2.



1  
2  
3  
4  
5 126 In each microscope setup, the illumination patterns were produced by a high-speed ferroelectric  
6  
7 127 liquid crystal on silicon (FLCOS) microdisplay (SXGA-3DM, Forth Dimension Displays, 13.6  $\mu\text{m}$  pixel  
8  
9 128 pitch). This particular FLCOS microdisplay has been used previously in  
10  
11 129 SIM [14,16,48,25,29,30,36,37,45–47], and in other optical sectioning systems such as programmable  
12  
13 130 array microscopy (PAM) [40,42,49]. The display was illuminated by a home-built, three channel LED  
14  
15 131 system based on high power LEDs (PT-54 or PT-120 with DK-114N or DK-136M controller, Luminous  
16  
17 132 Devices) with emission maxima at 460 nm, 525 nm, and 623 nm. The output of each LED was filtered  
18  
19 133 with a band pass filter (Chroma), and the three wavelengths were combined with appropriate dichroic  
20  
21 134 mirrors (Chroma). The light was then vertically polarized with a linear polarizer (Edmund Optics). We  
22  
23 135 imaged the microdisplay into the microscope using an external tube lens (table 2) and polarizing beam  
24  
25 136 splitter cube (Thor Labs). With any of the setups and when using a 100 $\times$  objective, single microdisplay  
26  
27 137 pixels are imaged into the sample with a nominal size of 136 nm, thus as diffraction-limited spots. This is  
28  
29 138 important for achieving the highest resolution results [37]. More details are available in the supplementary  
30  
31 139 material of [36].  
32  
33  
34  
35

36 140 The microdisplay allows one to create any desired illumination pattern. In our experiments, the  
37  
38 141 illumination masks consisted of line grids of different orientations ( $0^\circ$ ,  $90^\circ$ ,  $45^\circ$  and  $135^\circ$ ). The lines were  
39  
40 142 one microdisplay pixel thick (diffraction limited in the sample when using a 100 $\times$  objective) with a gap of  
41  
42 143 “off” pixels in between. The illumination line grid was shifted by one pixel between each image acquisition  
43  
44 144 to obtain a shifted illumination mask. The shift between each image was constant, and the sum of all  
45  
46 145 illumination masks resulted in homogenous illumination. Our optical setup, in which an incoherently  
47  
48 146 illuminated microdisplay is imaged into the sample with highly corrected microscope optics, results in  
49  
50 147 much more stable SIM illumination parameters compared to conventional SIM in which the illumination  
51  
52 148 pattern is created by laser interference. We use a unique spatial calibration method to determine, with very  
53  
54 149 high accuracy, the position of the patterned illumination in the sample [37]. This is a spatial domain process  
55  
56  
57  
58  
59  
60  
61  
62  
63  
64  
65

1  
2  
3  
4 150 and does not rely on fitting of data to a model except for the assumption that the imaging is linear and shift-  
5  
6  
7 151 invariant.

8  
9 152 **Insert Figure 1**

10  
11 153 **Table 1 Imaging parameters for the SIM datasets**

| Data                | sample              | Label (structure)                                                      | Pixel size, nm | Illumination                           | Exposure time, ms | SIM experiment type | SIM pattern # of angles/phases | Microscope system used |
|---------------------|---------------------|------------------------------------------------------------------------|----------------|----------------------------------------|-------------------|---------------------|--------------------------------|------------------------|
| SIM data 1 (Fig. 4) | Live U2-OS cells    | LAMP1-GFP (lysosomes and membrane)                                     | 65             | LED 480 nm                             | 25                | 2D time lapse       | 1/11                           | 1                      |
| SIM data 2 (Fig. 5) | Live A431 cells     | Dil-C16 (membrane)                                                     | 65             | LED 530 nm                             | 100               | 3D                  | 4/24                           | 3                      |
| SIM data 3 (Fig. 6) | Fixed rabbit testis | Hematoxylin and eosin (structural strain)                              | 65             | LED 530 nm                             | 200               | 3D                  | 1/11                           | 3                      |
| SIM data 4 (Fig. 7) | Fixed Hep-G2 cells  | Dendra2-H4 (nucleus)<br>Atto565-phalloidin (actin)                     | 65             | LED 480 nm<br>LED 530 nm               | 500               | 3D                  | 4/24                           | 1                      |
| SIM data 5 (Fig. 8) | Fixed BPAE cells    | AlexaFluor 488 phalloidin (actin)<br>Mitotracker CMXRos (mitochondria) | 65             | Lumencor spectra-X<br>470 nm<br>550 nm | 300               | 2D                  | 1/11                           | 2                      |

14  
15  
16  
17  
18  
19  
20  
21  
22  
23  
24  
25  
26  
27  
28  
29  
30  
31  
32  
33  
34 154  
35  
36 155 **Table 2 Parameters of the microscope systems**

| Setup | Microscope   | Objective                | sCMOS Camera    | Illumination tube lens focal length and part number |
|-------|--------------|--------------------------|-----------------|-----------------------------------------------------|
| 1     | Olympus IX71 | 100x/1.4 UPLSAPO         | Andor Neo 5.5   | 180 mm U-TLU                                        |
| 2     | Olympus IX83 | 100x/1.3 UPLFLN          | Andor Zyla 4.2+ | 180 mm SWTLU-C                                      |
| 3     | Leica DMI8   | 100x/1.47 HCX PLAPO TIRF | Andor Zyla 4.2+ | 200 mm 11525408                                     |

37  
38  
39  
40  
41  
42  
43  
44  
45  
46 156  
47  
48 157 *Data processing methods*

49  
50 158 We processed all of the data presented here using SIMToolbox, an open source, user friendly, and freely  
51  
52  
53 159 available program which our group developed for processing SIM data [36]. SIMToolbox, sample data,  
54  
55 160 and complete documentation are freely available (<http://mmtg.fel.cvut.cz/SIMToolbox>). SIMToolbox is  
56  
57 161 capable of OS-SIM [10,37], SR-SIM [8,9], and MAP-SIM [30] methods. See the supplementary  
58  
59 162 information for additional details about these methods.  
60  
61  
62  
63  
64  
65

1  
2  
3  
4  
5  
6  
7  
8  
9  
10  
11  
12  
13  
14  
15  
16  
17  
18  
19  
20  
21  
22  
23  
24  
25  
26  
27  
28  
29  
30  
31  
32  
33  
34  
35  
36  
37  
38  
39  
40  
41  
42  
43  
44  
45  
46  
47  
48  
49  
50  
51  
52  
53  
54  
55  
56  
57  
58  
59  
60  
61  
62  
63  
64  
65

163 *Resolution measurements - spatial domain method*

164 We used microscopy setup 1 (Olympus IX71) to measure spatial resolution by averaging spatial  
165 measurements from fifty individual 100 nm fluorescent beads. We used a 100×/1.40 NA oil immersion  
166 objective and 460 nm LED excitation (emission 500 - 550 nm). A 19 × 19 pixels region of interest (ROI)  
167 was selected around each bead in both the widefield and MAP-SIM images. The ROIs were then registered  
168 with sub-pixel accuracy using normalized cross-correlation. Each ROI was fit with a Gaussian function  
169 and the full width at half maximum (FWHM) was determined in the axial and lateral directions. Figure 2  
170 shows the resulting averaged FWHM values and PSF cross-sections.

171 **Insert Figure 2**

172 *Resolution measurements - frequency domain method*

173 It is desirable to measure the actual resolution achieved in SIM images (or image sequences) of cells or  
174 tissues, but suitable structures are not always present in the images. We therefore developed a robust  
175 frequency domain method which can be used to measure resolution in any fluorescence microscopy  
176 image [50].

177 The power spectral density (PSD) describes the distribution of the power of a signal with respect  
178 to its frequency. The PSD of an image is the squared magnitude of its Fourier transform, and can be written  
179 as

$$\text{PSD}(k,l) = |\mathcal{F}\{I(m,n)\}|^2 \quad (1)$$

181 where  $\mathcal{F}$  represents the Fourier transform,  $I(m,n)$  is the image intensity,  $m,n$  indexes the rows and columns  
182 of the 2D image, respectively, and  $(k,l)$  are coordinates in the frequency domain. In polar coordinates, the  
183 circularly averaged PSD ( $\text{PSD}_{\text{ca}}$ ) in frequency space with frequency  $q$  and angle  $\theta$  is given as

$$\text{PSD}_{\text{ca}} = 10 \cdot \log_{10} \left( \frac{1}{N_q} \sum_{\theta} \text{PSD}(q,\theta) \right) \quad (2)$$

185 which averages PSD at spatial frequency  $q$ .  $N_q$  is the number of pixels at a particular frequency  $q$ . The  
186 resolution limit in real space corresponds to the cut-off frequency in Fourier space. Assuming a noiseless

1  
2  
3  
4  
5  
6  
7  
8  
9  
10  
11  
12  
13  
14  
15  
16  
17  
18  
19  
20  
21  
22  
23  
24  
25  
26  
27  
28  
29  
30  
31  
32  
33  
34  
35  
36  
37  
38  
39  
40  
41  
42  
43  
44  
45  
46  
47  
48  
49  
50  
51  
52  
53  
54  
55  
56  
57  
58  
59  
60  
61  
62  
63  
64  
65

187 case, the cut-off frequency will be equal to the spatial frequency at which  $\text{PSD}_{\text{ca}}$  drops to zero. In practice,  
188  $\text{PSD}_{\text{ca}}$  contains non-zero values over the whole frequency range caused by noise. The signal to noise ratio  
189 (SNR) in Fourier space is generally very low close to the cut-off frequency, which makes precise detection  
190 of the cut-off frequency challenging. For this we use a spectral subtraction method [50]. Assuming additive  
191 noise, in the frequency domain we can write

$$\tilde{X}(k) = Y(k) - E[|N(k)|] \quad (3)$$

193 where  $Y$ ,  $\tilde{X}$ , and  $E[|N(k)|]$  represent the noisy signal, the desired signal, and the noise spectrum estimate  
194 (expected noise spectrum), respectively. The amplitude noise spectrum  $|N(k)|$  is estimated from the parts of  
195 signal where only noise is present. If the spatial sampling is high enough to fulfill the Nyquist–Shannon  
196 criterion and oversamples the resolution limit of SR-SIM, spatial frequencies close to the half of the  
197 sampling frequency do not contain useful signal and can be used for noise estimation. We varied the  
198 frequency cut-off threshold over the range  $\langle 0.95f_{\text{max}}; f_{\text{max}} \rangle$ , estimated the level of noise for every threshold  
199 value, and obtained the mean and variance of the cut-off frequency (i.e. the resolution estimate). The  $f_{\text{max}}$   
200 is given by  $f_{\text{max}} = \frac{f_s}{2} = \frac{1}{2p_{xy}}$ , where  $f_s$  and  $p_{xy}$  are the sampling frequency and the backprojected pixel  
201 size, respectively.

202 Figure 3 shows the  $\text{PSD}_{\text{ca}}$  and corresponding resolution limit measured for the data shown in Fig.  
203 5. Using our resolution estimation algorithm, we calculated a lateral spatial resolution of 294 nm for WF,  
204 and 141 nm for MAP-SIM. The measured resolution is in approximate agreement with our results measured  
205 on 100 nm fluorescent beads (Fig. 2).

206 **Insert Figure 3**

207 *Imaging live cells, fixed cells, and tissues with SIM*

208 To demonstrate the utility of our approach in imaging live cells, we imaged U2-OS cells that had been  
209 transfected with GFP-tagged lysosomal associated membrane protein (LAMP1-GFP). LAMP1 is a highly  
210 glycosylated protein which is found on the surface of lysosomes and in the plasma membrane [51]. Fig. 4

1  
2  
3  
4  
5  
6  
7  
8  
9  
10  
11  
12  
13  
14  
15  
16  
17  
18  
19  
20  
21  
22  
23  
24  
25  
26  
27  
28  
29  
30  
31  
32  
33  
34  
35  
36  
37  
38  
39  
40  
41  
42  
43  
44  
45  
46  
47  
48  
49  
50  
51  
52  
53  
54  
55  
56  
57  
58  
59  
60  
61  
62  
63  
64  
65

211 shows widefield, OS-SIM, and MAP-SIM images of U2-OS cells expressing LAMP1-GFP, and the fast  
212 Fourier transform (FFT) of each image. The dotted circles in Fig. 4(d-f) show the approximate limit of  
213 resolution in each image. We found that, in addition to lysosomal expression, LAMP1-GFP is also present  
214 in high concentrations in the plasma membrane of U2-OS cells.

215 In this experiment, we acquired SIM image sequences with an exposure time of 25 ms, a raw  
216 imaging rate of 40 Hz. We used a SIM pattern with 11 phases (pattern period in the sample plane 1.5  $\mu\text{m}$ )  
217 and a single angle ( $0^\circ$  with respect to the camera), acquiring 3982 total frames, resulting in 472 processed  
218 frames (see table 1). The imaging rate of processed result frames was therefore 3.6 Hz. The full image  
219 sequence is available at [http://mmtg.fel.cvut.cz/mapsimlive\\_suppl/](http://mmtg.fel.cvut.cz/mapsimlive_suppl/). It is also available at Giga DB. We  
220 further analyzed this data as shown in the supplementary material (Figure S2-S3).

221 **Insert Figure 4**

222 We next imaged live A431 cells which we labeled with the fluorescent lipid DiI-C16. In this experiment  
223 we acquired SIM image sequences with an exposure time of 100 ms, a raw imaging rate of 10 Hz. We used  
224 a SIM pattern with 34 total phases and four angles (see table 1). This data is shown in Figure 5.

225 **Insert Figure 5**

226 Figure 6 shows SIM imaging of fixed tissues, in this case the seminiferous tubule of the rabbit stained with  
227 hematoxylin and eosin.

228 **Insert Figure 6**

229 Figure 7 shows SIM imaging of fixed HEPG2 cells expressing H4-Dendra, a nuclear marker. We also  
230 stained the cells with Atto 532-phalloidin to label the actin cytoskeleton.

231 **Insert Figure 7**

232 Figure 8 shows SIM imaging of fixed BPAE cells labeled with Alexa 488-phalloidin and mitotracker  
233 CMXRos to visualize the actin cytoskeleton and mitochondria, respectively.

234 **Insert Figure 8**

## 5. Discussion

SIM results sometimes suffer from artifacts related to the illumination pattern. The artifacts, which can be severe and are a cause for concern, can be due to several factors including illumination pattern phase instability and pattern distortion because of refractive index mismatch between the sample and the immersion fluid. In our hands, MAP-SIM results do not suffer from detectable patterned artifacts, Fig. 2(c), and the FFT of the MAP-SIM result is free of noticeable spurious peaks, Fig. 2(f). We attribute this to several factors, primarily the use of incoherent illumination together with a SLM for pattern generation. This, combined with precise synchronization of the SIM system helps eliminate patterned artifacts. Additional artifacts in SIM images can arise due to the detector. In sCMOS cameras like the one we used, each pixel reads out through its own amplifier and as such, each pixel exhibits a different gain. While very minor, such artifacts can be corrected using a variance stabilization method as has been introduced for single molecule localization microscopy [52].

There are several other advantages to the use of incoherent illumination in SIM, including removing the need for a pupil plane mask to block unwanted diffraction orders that are generated when using laser interference. Also, incoherent imaging of a SLM for pattern formation means that the pattern frequency does not depend on the wavelength.

The LCOS microdisplay (and vendor-supplied microdisplay-timing program) we used can display an illumination pattern and switch to the next pattern in the sequence in 1.14 ms, allowing unprocessed SIM images to be acquired at rates of approximately 875 Hz. However, such rapid imaging is not useful if the reconstructed SIM images are of poor quality, for example if they suffer from low signal to noise ratios. Specifying the fastest possible acquisition rate is inadequate without consideration of the resolution and SNR of the results. Our resolution analysis shown in Figs. 3-4 uses measured quantities to evaluate SIM results and helps to make realistic conclusions about imaging speeds.

## 6. Re-use potential

1  
2  
3  
4 259 The presented SIM datasets can be reused in several ways. Researchers investigating SIM  
5  
6  
7 260 reconstruction algorithms can use the datasets to compare their results with those presented here, including  
8  
9 261 the newer method MAP-SIM. Also, the data may be further analyzed in other ways. One possibility is  
10  
11 262 shown in the supplementary material (part 2: Single particle tracking experiments in LAMP1-GFP cells.)  
12  
13 263 Here, we used single particle tracking methods to study the mobility of lysosomes within U2-OS cells.

#### 15 264 **Availability of source code and requirements**

17 265 Project name: SIMToolbox v1.3

19 266 Project home page: <http://mmtg.fel.cvut.cz/SIMToolbox/>

21 267 Operating system: platform independent

23 268 Programming language: MATLAB

25 269 License: GNU General Public License v3.0

#### 27 270 **Detailed software compatibility notes**

29 271 The SIMToolbox GUI was compiled with MATLAB 2015a and tested in Windows 7 and 8. The GUI is a  
30  
31 272 stand-alone program and does not require MATLAB to be installed. To use the MATLAB functions within  
32  
33 273 SIMToolbox (i.e., without the GUI), MATLAB must be installed. The functions were mainly developed  
34  
35 274 with 64 bit MATLAB versions 2012b, 2014a, 2015a in Windows 7. When using SIMToolbox functions  
36  
37 275 without the GUI, the MATLAB “Image Processing Toolbox” is required. SIMToolbox also requires the  
38  
39 276 “MATLAB YAML” package to convert MATLAB objects to/from YAML file format. Note that this  
40  
41 277 package is installed automatically when using the GUI.  
42  
43  
44

#### 45 278 **Availability of data**

47 279 All raw and analyzed data is available on GigaDB at <http://gigadb.org/site/index>.

#### 49 280 **Abbreviations**

51 281 GFP, green fluorescent protein, NA, numerical aperture; PSF, point spread function; WF, wide field; SIM,  
52  
53 282 structured illumination microscopy; PSD, power spectral density; PSDca, circularly averaged power  
54  
55 283 spectral density.  
56  
57  
58  
59  
60  
61  
62  
63  
64  
65

1  
2  
3  
4  
5  
6  
7  
8  
9  
10  
11  
12  
13  
14  
15  
16  
17  
18  
19  
20  
21  
22  
23  
24  
25  
26  
27  
28  
29  
30  
31  
32  
33  
34  
35  
36  
37  
38  
39  
40  
41  
42  
43  
44  
45  
46  
47  
48  
49  
50  
51  
52  
53  
54  
55  
56  
57  
58  
59  
60  
61  
62  
63  
64  
65

284 **Ethics approval and consent to participate**

285 Not applicable

286 **Consent for publication**

287 Not applicable

288 **Competing interests**

289 The authors declare that they have no competing interests.

290 **Funding**

291 This work was supported by the National Institutes of Health grant number 1R15GM128166-01. This work  
292 was also supported by the UCCS center for the University of Colorado BioFrontiers Institute, by the Czech  
293 Science Foundation, and by Czech Technical University in Prague (grant number  
294 SGS18/141/OHK3/2T/13). T.L. acknowledges a SCIEX scholarship (project code 13.183). The funding  
295 sources had no involvement in study design; in the collection, analysis and interpretation of data; in the  
296 writing of the report; or in the decision to submit the article for publication. This material is based in part  
297 upon work supported by the National Science Foundation under Grant Number 1727033. Any opinions,  
298 findings, and conclusions or recommendations expressed in this material are those of the authors and do  
299 not necessarily reflect the views of the National Science Foundation.

300 **Author Contributions**

301 TL: analyzed data, developed computer code

302 JP: analyzed data, developed computer code

303 KF: supervised research

304 KS: analyzed data

305 JB: acquired data

306 GH: conceived project, acquired data, analyzed data, supervised research, wrote the paper

307 **Acknowledgements**



1  
2  
3  
4  
5  
6  
7  
8  
9  
10  
11  
12  
13  
14  
15  
16  
17  
18  
19  
20  
21  
22  
23  
24  
25  
26  
27  
28  
29  
30  
31  
32  
33  
34  
35  
36  
37  
38  
39  
40  
41  
42  
43  
44  
45  
46  
47  
48  
49  
50  
51  
52  
53  
54  
55  
56  
57  
58  
59  
60  
61  
62  
63  
64  
65

308 The authors thank Dr. Donna Arndt-Jovin and Dr. Tomas Jovin of the Max Planck Institute for Biophysical  
309 Chemistry (Göttingen, Germany) for the A431 cells. The authors thank Viola Hausnerová and Christian  
310 Lanctôt, Charles University in Prague (Prague, Czech Republic), for the LAMP1-GFP cells. The authors  
311 thank Pavel Křížek, Zdeněk Švindrych, and Martin Ovesný for help with data acquisition, microscopy  
312 development, programming, and data analysis.

### 313 **References**

- 314 1. E. Betzig, G. H. Patterson, R. Sougrat, O. W. Lindwasser, S. Olenych, J. S. Bonifacino, M. W.  
315 Davidson, J. Lippincott-Schwartz, and H. F. Hess, "Imaging intracellular fluorescent proteins at  
316 nanometer resolution," *Science* **313**, 1642–5 (2006).
- 317 2. S. T. Hess, T. P. K. Girirajan, and M. D. Mason, "Ultra-high resolution imaging by fluorescence  
318 photoactivation localization microscopy," *Biophys. J.* **91**, 4258–4272 (2006).
- 319 3. M. J. Rust, M. Bates, and X. Zhuang, "Sub-diffraction-limit imaging by stochastic optical  
320 reconstruction microscopy (STORM)," *Nat. Methods* **3**, 793–795 (2006).
- 321 4. M. Heilemann, S. van de Linde, M. Schüttpelz, R. Kasper, B. Seefeldt, A. Mukherjee, P. Tinnefeld,  
322 and M. Sauer, "Subdiffraction-resolution fluorescence imaging with conventional fluorescent  
323 probes," *Angew. Chemie Int. Ed.* **47**, 6172–6176 (2008).
- 324 5. T. Dertinger, R. Colyer, G. Iyer, S. Weiss, and J. Enderlein, "Fast, background-free, 3D super-  
325 resolution optical fluctuation imaging (SOFI)," *Proc. Natl. Acad. Sci. U. S. A.* **106**, 22287–22292  
326 (2009).
- 327 6. S. Geissbuehler, N. L. Bocchio, C. Dellagiacomma, C. Berclaz, M. Leutenegger, and T. Lasser,  
328 "Mapping molecular statistics with balanced super-resolution optical fluctuation imaging (bSOFI),"  
329 *Opt. Nanoscopy* **1**, 4 (2012).
- 330 7. S. W. Hell and J. Wichmann, "Breaking the diffraction resolution limit by stimulated emission:  
331 stimulated-emission-depletion fluorescence microscopy," *Opt. Lett.* **19**, 780 (1994).
- 332 8. R. Heintzmann and C. Cremer, "Laterally modulated excitation microscopy: improvement of

1  
2  
3  
4  
5  
6  
7  
8  
9  
10  
11  
12  
13  
14  
15  
16  
17  
18  
19  
20  
21  
22  
23  
24  
25  
26  
27  
28  
29  
30  
31  
32  
33  
34  
35  
36  
37  
38  
39  
40  
41  
42  
43  
44  
45  
46  
47  
48  
49  
50  
51  
52  
53  
54  
55  
56  
57  
58  
59  
60  
61  
62  
63  
64  
65

333 resolution by using a diffraction grating," *Proc. SPIE* **3568**, 185–196 (1998).

334 9. M. G. L. Gustafsson, "Surpassing the lateral resolution limit by a factor of two using structured  
335 illumination microscopy," *J. Microsc.* **198**, 82–87 (2000).

336 10. M. A. A. Neil, R. Juškaitis, and T. Wilson, "Method of obtaining optical sectioning by using  
337 structured light in a conventional microscope," *Opt. Lett.* **22**, 1905–1907 (1997).

338 11. M. G. L. Gustafsson, L. Shao, P. M. Carlton, C. J. R. Wang, I. N. Golubovskaya, W. Z. Cande, D.  
339 A. Agard, and J. W. Sedat, "Three-dimensional resolution doubling in widefield fluorescence  
340 microscopy by structured illumination," *Biophys. J.* **94**, 4957–4970 (2008).

341 12. P. Kner, B. B. Chhun, E. R. Griffis, L. Winoto, and M. G. L. Gustafsson, "Super-resolution video  
342 microscopy of live cells by structured illumination," *Nat. Methods* **6**, 339–342 (2009).

343 13. L. M. Hirvonen, K. Wicker, O. Mandula, and R. Heintzmann, "Structured illumination microscopy  
344 of a living cell," *Eur. Biophys. J.* **38**, 807–812 (2009).

345 14. L. Shao, P. Kner, E. H. Rego, and M. G. L. Gustafsson, "Super-resolution 3D microscopy of live  
346 whole cells using structured illumination," *Nat. Methods* **8**, 1044–1046 (2011).

347 15. L. Schermelleh, P. M. Carlton, S. Haase, L. Shao, L. Winoto, P. Kner, B. Burke, M. C. Cardoso, D.  
348 A. Agard, M. G. L. Gustafsson, H. Leonhardt, and J. W. Sedat, "Subdiffraction multicolor imaging  
349 of the nuclear periphery with 3D structured illumination microscopy," *Science* **320**, 1332–1336  
350 (2008).

351 16. R. Fiolka, L. Shao, E. H. Rego, M. W. Davidson, and M. G. L. Gustafsson, "Time-lapse two-color  
352 3D imaging of live cells with doubled resolution using structured illumination," *Proc. Natl. Acad.  
353 Sci. U. S. A.* **109**, 5311–5315 (2012).

354 17. A. G. York, S. H. Parekh, D. D. Nogare, R. S. Fischer, K. Temprine, M. Mione, A. B. Chitnis, C.  
355 A. Combs, and H. Shroff, "Resolution doubling in live, multicellular organisms via multifocal  
356 structured illumination microscopy," *Nat. Methods* **9**, 749–754 (2012).

357 18. M. Ingaramo, A. G. York, P. Wawrzusin, O. Milberg, A. Hong, R. Weigert, H. Shroff, and G. H.

1  
2  
3  
4  
5  
6  
7  
8  
9  
10  
11  
12  
13  
14  
15  
16  
17  
18  
19  
20  
21  
22  
23  
24  
25  
26  
27  
28  
29  
30  
31  
32  
33  
34  
35  
36  
37  
38  
39  
40  
41  
42  
43  
44  
45  
46  
47  
48  
49  
50  
51  
52  
53  
54  
55  
56  
57  
58  
59  
60  
61  
62  
63  
64  
65

358 Patterson, "Two-photon excitation improves multifocal structured illumination microscopy in thick  
359 scattering tissue," *Proc. Natl. Acad. Sci. U. S. A.* **111**, 5254–9 (2014).

360 19. A. G. York, P. Chandris, D. D. Nogare, J. Head, P. Wawrzusin, R. S. Fischer, A. Chitnis, and H.  
361 Shroff, "Instant super-resolution imaging in live cells and embryos via analog image processing,"  
362 *Nat. Methods* **10**, 1122–6 (2013).

363 20. M. Schropp and R. Uhl, "Two-dimensional structured illumination microscopy," *J. Microsc.* **256**,  
364 23–36 (2014).

365 21. M. Schropp, C. Seebacher, and R. Uhl, "XL-SIM: Extending Superresolution into Deeper Layers,"  
366 *Photonics* **4**, 33 (2017).

367 22. T. A. Planchon, L. Gao, D. E. Milkie, M. W. Davidson, J. A. Galbraith, G. Catherine, C. G.  
368 Galbraith, and E. Betzig, "Rapid three-dimensional isotropic imaging of living cells using Bessel  
369 beam plane illumination," *Nat. Methods* **8**, 417–423 (2011).

370 23. P. J. Keller, A. D. Schmidt, A. Santella, K. Khairy, Z. Bao, J. Wittbrodt, and E. H. K. Stelzer, "Fast,  
371 high-contrast imaging of animal development with scanned light sheet-based structured-  
372 illumination microscopy," *Nat Meth* **7**, 637–642 (2010).

373 24. L. Gao, L. Shao, C. C. D. Higgins, J. S. J. Poulton, M. Peifer, M. W. Davidson, X. Wu, B. Goldstein,  
374 and E. Betzig, "Noninvasive imaging beyond the diffraction limit of 3D dynamics in thickly  
375 fluorescent specimens," *Cell* **151**, 1370–1385 (2012).

376 25. B.-C. Chen, W. R. Legant, K. Wang, L. Shao, D. E. Milkie, M. W. Davidson, C. Janetopoulos, X.  
377 S. Wu, J. A. Hammer, Z. Liu, B. P. English, Y. Mimori-Kiyosue, D. P. Romero, A. T. Ritter, J.  
378 Lippincott-Schwartz, L. Fritz-Laylin, R. D. Mullins, D. M. Mitchell, J. N. Bembenek, A.-C.  
379 Reymann, R. Bohme, S. W. Grill, J. T. Wang, G. Seydoux, U. S. Tulu, D. P. Kiehart, and E. Betzig,  
380 "Lattice light-sheet microscopy: Imaging molecules to embryos at high spatiotemporal resolution,"  
381 *Science* **346**, 1257998 (2014).

382 26. D. Li, L. Shao, B.-C. Chen, X. Zhang, M. Zhang, B. Moses, D. E. Milkie, J. R. Beach, J. A. Hammer,

1  
2  
3  
4  
5  
6  
7  
8  
9  
10  
11  
12  
13  
14  
15  
16  
17  
18  
19  
20  
21  
22  
23  
24  
25  
26  
27  
28  
29  
30  
31  
32  
33  
34  
35  
36  
37  
38  
39  
40  
41  
42  
43  
44  
45  
46  
47  
48  
49  
50  
51  
52  
53  
54  
55  
56  
57  
58  
59  
60  
61  
62  
63  
64  
65

383 M. Pasham, T. Kirchhausen, M. A. Baird, M. W. Davidson, P. Xu, and E. Betzig, "Extended-  
384 resolution structured illumination imaging of endocytic and cytoskeletal dynamics," *Science* **349**,  
385 aab3500 (2015).

386 27. S. Dong, P. Nanda, R. Shiradkar, K. Guo, and G. Zheng, "High-resolution fluorescence imaging  
387 via pattern-illuminated Fourier ptychography.," *Opt. Express* **22**, 20856–70 (2014).

388 28. F. Orieux, E. Sepulveda, V. Lorient, B. Dubertret, and J.-C. Olivo-Marin, "Bayesian estimation for  
389 optimized structured illumination microscopy.," *IEEE Trans. Image Process.* **21**, 601–14 (2012).

390 29. T. Lukeš, G. M. G. M. Hagen, P. Křížek, Z. Švindrych, K. Fliegel, M. Klíma, P. Krížek, Z.  
391 Švindrych, K. Fliegel, and M. Klíma, "Comparison of image reconstruction methods for structured  
392 illumination microscopy," *Proc. SPIE* **9129**, 91293J (2014).

393 30. T. Lukeš, P. Křížek, Z. Švindrych, J. Benda, M. Ovesný, K. Fliegel, M. Klíma, and G. M. Hagen,  
394 "Three-dimensional super-resolution structured illumination microscopy with maximum a  
395 posteriori probability image estimation," *Opt. Express* **22**, 29805–17 (2014).

396 31. E. Mudry, K. Belkebir, J. Girard, J. Savatier, E. Le Moal, C. Nicoletti, M. Allain, and A. Sentenac,  
397 "Structured illumination microscopy using unknown speckle patterns," *Nat. Photonics* **6**, 312–315  
398 (2012).

399 32. X. Huang, J. Fan, L. Li, H. Liu, R. Wu, Y. Wu, L. Wei, H. Mao, A. Lal, P. Xi, L. Tang, Y. Zhang,  
400 Y. Liu, S. Tan, and L. Chen, "Fast, long-term, super-resolution imaging with Hessian structured  
401 illumination microscopy," *Nat. Biotechnol.* (2018).

402 33. V. Perez, B. J. Chang, and E. H. K. Stelzer, "Optimal 2D-SIM reconstruction by two filtering steps  
403 with Richardson-Lucy deconvolution," *Sci. Rep.* **6**, 37149 (2016).

404 34. K. Chu, P. J. McMillan, Z. J. Smith, J. Yin, J. Atkins, P. Goodwin, S. Wachsmann-Hogiu, and S.  
405 Lane, "Image reconstruction for structured-illumination microscopy with low signal level," *Opt.*  
406 *Express* **22**, 8687 (2014).

407 35. N. Chakrova, B. Rieger, and S. Stallinga, "Deconvolution methods for structured illumination

1  
2  
3  
4  
5  
6  
7  
8  
9  
10  
11  
12  
13  
14  
15  
16  
17  
18  
19  
20  
21  
22  
23  
24  
25  
26  
27  
28  
29  
30  
31  
32  
33  
34  
35  
36  
37  
38  
39  
40  
41  
42  
43  
44  
45  
46  
47  
48  
49  
50  
51  
52  
53  
54  
55  
56  
57  
58  
59  
60  
61  
62  
63  
64  
65

microscopy," *J. Opt. Soc. Am. A* **33**, B12 (2016).

36. P. Křížek, T. Lukeš, M. Ovesný, K. Fliegel, and G. M. Hagen, "SIMToolbox: A MATLAB toolbox for structured illumination fluorescence microscopy," *Bioinformatics* **32**, 318–320 (2015).

37. P. Křížek, I. Raška, and G. M. Hagen, "Flexible structured illumination microscope with a programmable illumination array," *Opt. Express* **20**, 24585 (2012).

38. D. Dan, M. Lei, B. Yao, W. Wang, M. Winterhalder, A. Zumbusch, Y. Qi, L. Xia, S. Yan, Y. Yang, P. Gao, T. Ye, and W. Zhao, "DMD-based LED-illumination super-resolution and optical sectioning microscopy.," *Sci. Rep.* **3**, 1116 (2013).

39. P. Křížek and G. M. Hagen, "Spatial light modulators in fluorescence microscopy," in *Microscopy: Science, Technology, Applications and Education*, A. Méndez-Vilas, ed., 4th ed. (Formatex, 2010), Vol. 2, pp. 1366–1377.

40. G. M. Hagen, W. Caarls, K. A. Lidke, A. H. B. De Vries, C. Fritsch, B. G. Barisas, D. J. Arndt-Jovin, and T. M. Jovin, "Fluorescence recovery after photobleaching and photoconversion in multiple arbitrary regions of interest using a programmable array microscope," *Microsc. Res. Tech.* **72**, 431–440 (2009).

41. L. Song, H.-W. Lu-Walther, R. Förster, A. Jost, M. Kielhorn, J. Zhou, and R. Heintzmann, "Fast structured illumination microscopy using rolling shutter cameras," *Meas. Sci. Technol.* **27**, 055401 (2016).

42. G. M. Hagen, W. Caarls, M. Thomas, A. Hill, K. A. Lidke, B. Rieger, C. Fritsch, B. van Geest, T. M. Jovin, and D. J. Arndt-Jovin, "Biological applications of an LCoS-based programmable array microscope," *Proc. SPIE* **64410S**, 1–12 (2007).

43. C. A. Werley, M.-P. Chien, and A. E. Cohen, "An ultrawidefield microscope for high-speed fluorescence imaging and targeted optogenetic stimulation," *Biomed. Opt. Express* **8**, 5794 (2017).

44. Z. Cvačková, M. Mašata, D. Staněk, H. Fidlerová, and I. Raška, "Chromatin position in human HepG2 cells: although being non-random, significantly changed in daughter cells.," *J. Struct. Biol.*

1  
2  
3  
4  
5  
6  
7  
8  
9  
10  
11  
12  
13  
14  
15  
16  
17  
18  
19  
20  
21  
22  
23  
24  
25  
26  
27  
28  
29  
30  
31  
32  
33  
34  
35  
36  
37  
38  
39  
40  
41  
42  
43  
44  
45  
46  
47  
48  
49  
50  
51  
52  
53  
54  
55  
56  
57  
58  
59  
60  
61  
62  
63  
64  
65

433 **165**, 107–17 (2009).

434 45. R. Förster, H.-W. Lu-Walther, A. Jost, M. Kielhorn, K. Wicker, and R. Heintzmann, "Simple  
435 structured illumination microscope setup with high acquisition speed by using a spatial light  
436 modulator," *Opt. Express* **22**, 20663–77 (2014).

437 46. H.-W. Lu-Walther, M. Kielhorn, R. Förster, A. Jost, K. Wicker, and R. Heintzmann, "fastSIM: a  
438 practical implementation of fast structured illumination microscopy," *Methods Appl. Fluoresc.* **3**,  
439 014001 (2015).

440 47. T. C. Schlichenmeyer, M. Wang, K. N. Elfer, and J. Q. Brown, "Video-rate structured illumination  
441 microscopy for high-throughput imaging of large tissue areas.," *Biomed. Opt. Express* **5**, 366–77  
442 (2014).

443 48. L. J. Young, F. Ströhl, and C. F. Kaminski, "A Guide to Structured Illumination TIRF Microscopy  
444 at High Speed with Multiple Colors," *J. Vis. Exp.* e53988–e53988 (2016).

445 49. S. R. Kantelhardt, W. Caarls, A. H. B. de Vries, G. M. Hagen, T. M. Jovin, W. Schulz-Schaeffer,  
446 V. Rohde, A. Giese, and D. J. Arndt-Jovin, "Specific visualization of glioma cells in living low-  
447 grade tumor tissue," *PLoS One* **5**, 1–11 (2010).

448 50. J. Pospíšil, K. Fliegel, and M. Klíma, "Assessing resolution in live cell structured illumination  
449 microscopy," in *Proceedings of SPIE - The International Society for Optical Engineering*, P. Páta  
450 and K. Fliegel, eds. (SPIE, 2017), Vol. 10603, p. 39.

451 51. A. K. Agarwal, N. Srinivasan, R. Godbole, S. K. More, S. Budnar, R. P. Gude, and R. D. Kalraiya,  
452 "Role of tumor cell surface lysosome-associated membrane protein-1 (LAMP1) and its associated  
453 carbohydrates in lung metastasis.," *J. Cancer Res. Clin. Oncol.* **141**, 1563–74 (2015).

454 52. F. Huang, T. M. P. Hartwich, F. E. Rivera-Molina, Y. Lin, W. C. Duim, J. J. Long, P. D. Uchil, J.  
455 R. Myers, M. A. Baird, W. Mothes, M. W. Davidson, D. Toomre, and J. Bewersdorf, "Video-rate  
456 nanoscopy using sCMOS camera-specific single-molecule localization algorithms.," *Nat. Methods*  
457 **10**, 1–9 (2013).

1  
2  
3  
4 53. M. Geissbuehler and T. Lasser, "How to display data by color schemes compatible with red-green  
5  
6  
7 459 color perception deficiencies.," Opt. Express **21**, 9862–74 (2013).  
8

9 460 **FIGURE CAPTIONS**

10  
11 461 **Figure 1:** Structured illumination microscope setup, which we used with different microscope bodies and  
12  
13 462 cameras. See text and table 2 for details.

14  
15 463 **Figure 2:** Measurements of the spatial resolution on a sample of fluorescent beads. Cross-sections of the  
16  
17 464 PSF are obtained by averaging measurements over 50 beads along lateral and axial directions.

18  
19 465 **Figure 3:** Resolution analysis and normalized power spectral density (PSD) measured on a selected image  
20  
21 466 from the data in Fig. 5. The results indicate a circularly-averaged PSD lateral spatial resolution of 294 nm  
22  
23 467 for WF, and 141 nm for MAP-SIM, in approximate agreement with the analysis in Fig. 4(d-f).  
24  
25

26  
27 468 **Figure 4:** Imaging live cells beyond the diffraction limit with MAP-SIM. U2-OS cells expressing LAMP1-  
28  
29 469 GFP were imaged using the LCOS-based SIM system. Subsequent processing using OS-SIM or MAP-SIM  
30  
31 470 methods. (a) WF, (b) OS-SIM, (c) MAP-SIM, (d) FFT of WF, (e) FFT of OS-SIM, (f) FFT of MAP-SIM.  
32  
33 471 The images were individually scaled for presentation. The dotted circular lines indicated approximate  
34  
35 472 resolution achieved in each image according to analysis of the FFT. The full image sequence is available  
36  
37 473 at [http://mmtg.fel.cvut.cz/mapsimlive\\_suppl/](http://mmtg.fel.cvut.cz/mapsimlive_suppl/).  
38  
39

40 474 **Figure 5:** Imaging live cells beyond the diffraction limit with SIM. A431 cells labeled with DiI-C16 were  
41  
42 475 imaged using the LCOS-based SIM system. Subsequent processing using SR-SIM or MAP-SIM methods.  
43  
44 476 (a) WF, (c) SR-SIM, (e) MAP-SIM. (b), (d), and (f) each show a zoom-in of the region indicated in (a). (f)  
45  
46 477 shows the SIM illumination pattern in one of the four angles used. (g) shows a FFT of the image in (f). The  
47  
48 478 images were individually scaled for visualization purposes. Each is a maximum intensity projection of 3 Z  
49  
50 479 positions (spacing 400 nm (except for f and g which show a single Z-position)).  
51  
52

53  
54 480 **Figure 6:** Imaging animal tissues using the LCOS-based SIM system and subsequent processing using OS-  
55  
56 481 SIM or MAP-SIM methods. Seminiferous tubule of the rabbit stained with hematoxylin and eosin. (a) WF,  
57  
58 482 (c) OS-SIM, (e) MAP-SIM. (b), (d), and (f) each show a zoom-in of the region indicated in (a). (f) shows  
59  
60  
61  
62  
63  
64  
65

1  
2  
3  
4  
5  
6  
7  
8  
9  
10  
11  
12  
13  
14  
15  
16  
17  
18  
19  
20  
21  
22  
23  
24  
25  
26  
27  
28  
29  
30  
31  
32  
33  
34  
35  
36  
37  
38  
39  
40  
41  
42  
43  
44  
45  
46  
47  
48  
49  
50  
51  
52  
53  
54  
55  
56  
57  
58  
59  
60  
61  
62  
63  
64  
65

483 the SIM illumination pattern in one of the four angles used. (g) MAP-SIM depth-coded using the lookup  
484 table isolum [53]. The images were individually scaled for visualization purposes. Each is a maximum  
485 intensity projection of 31 Z-positions (spacing 300 nm (except for (a, b, f) which shows 1 Z-position).

486 **Figure 7:** SIM imaging of fixed HEP-G2 cells expressing Dendra2-H4 (nucleus) and labeled with Atto-  
487 532 phalloidin. (a) WF, (c) SR-SIM, (e) MAP-SIM. (b), (d), and (f) each show a zoom-in of the region  
488 indicated in (a). (f) shows the SIM illumination pattern in one of the four angles used. (g) shows a FFT of  
489 the image in (f). The images were individually scaled for visualization purposes. Each is a maximum  
490 intensity projection of 22 Z-positions (spacing 200 nm (except for a, b, f and g which show 1 Z-position).

491 **Figure 8:** 2D SIM imaging of fixed BPAE cells labeled with Alexa 488-phalloidin (actin) and mitotracker  
492 CMXRos (mitochondria). (a) WF, (b) MAPSIM.



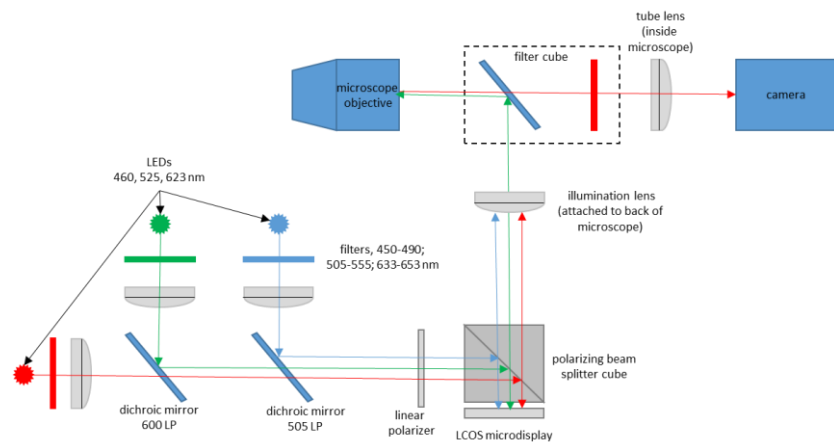

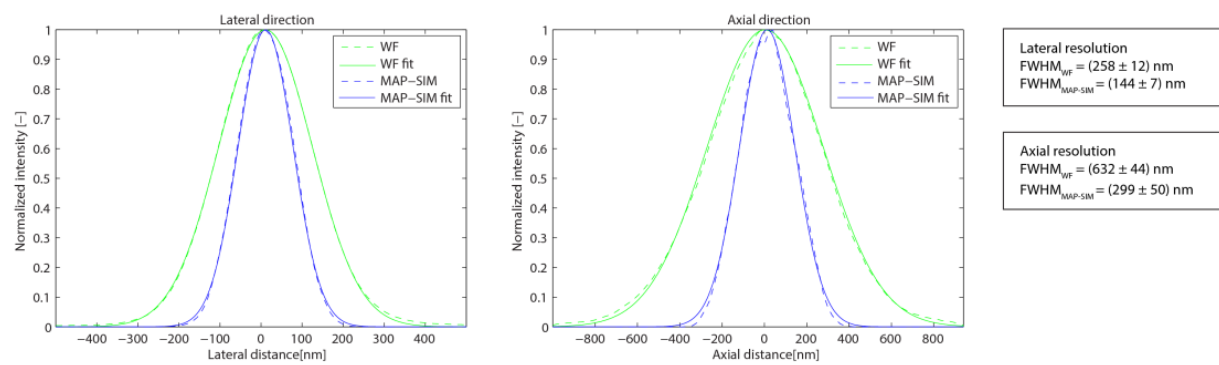

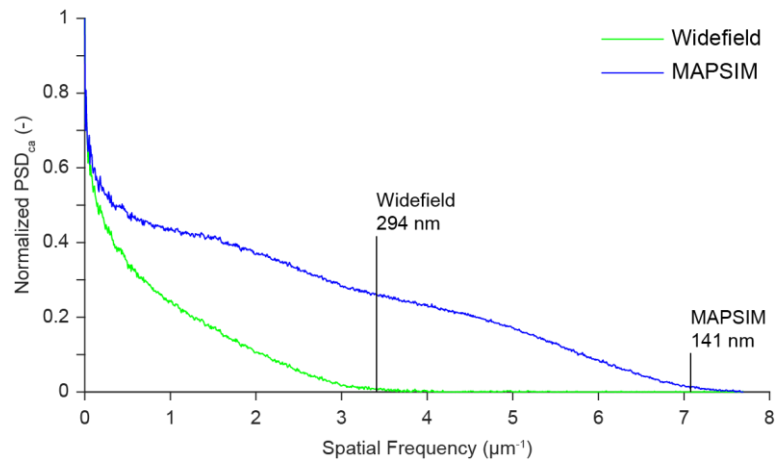

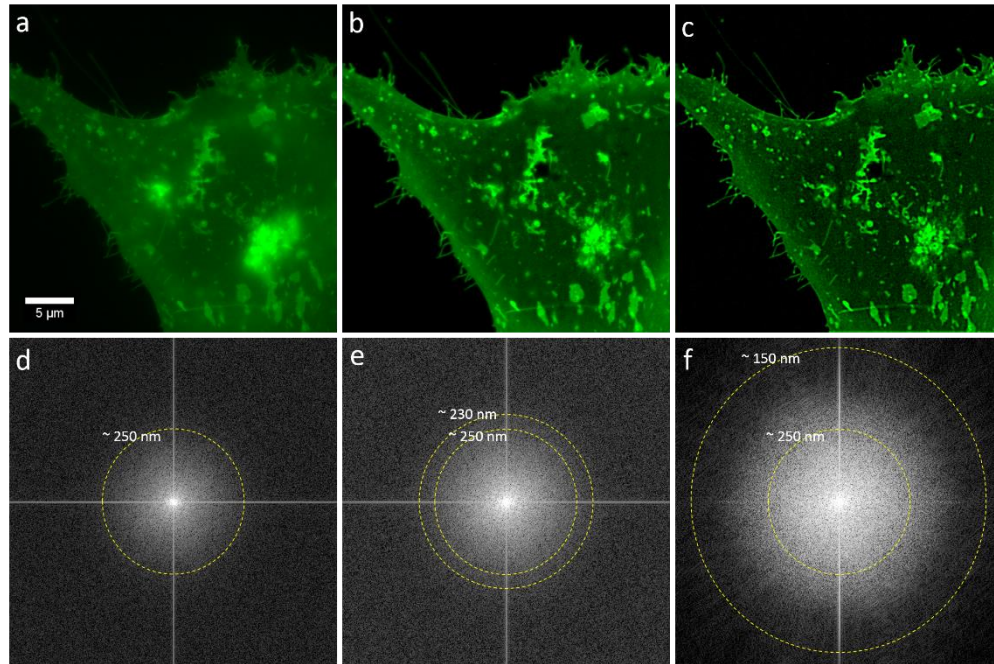

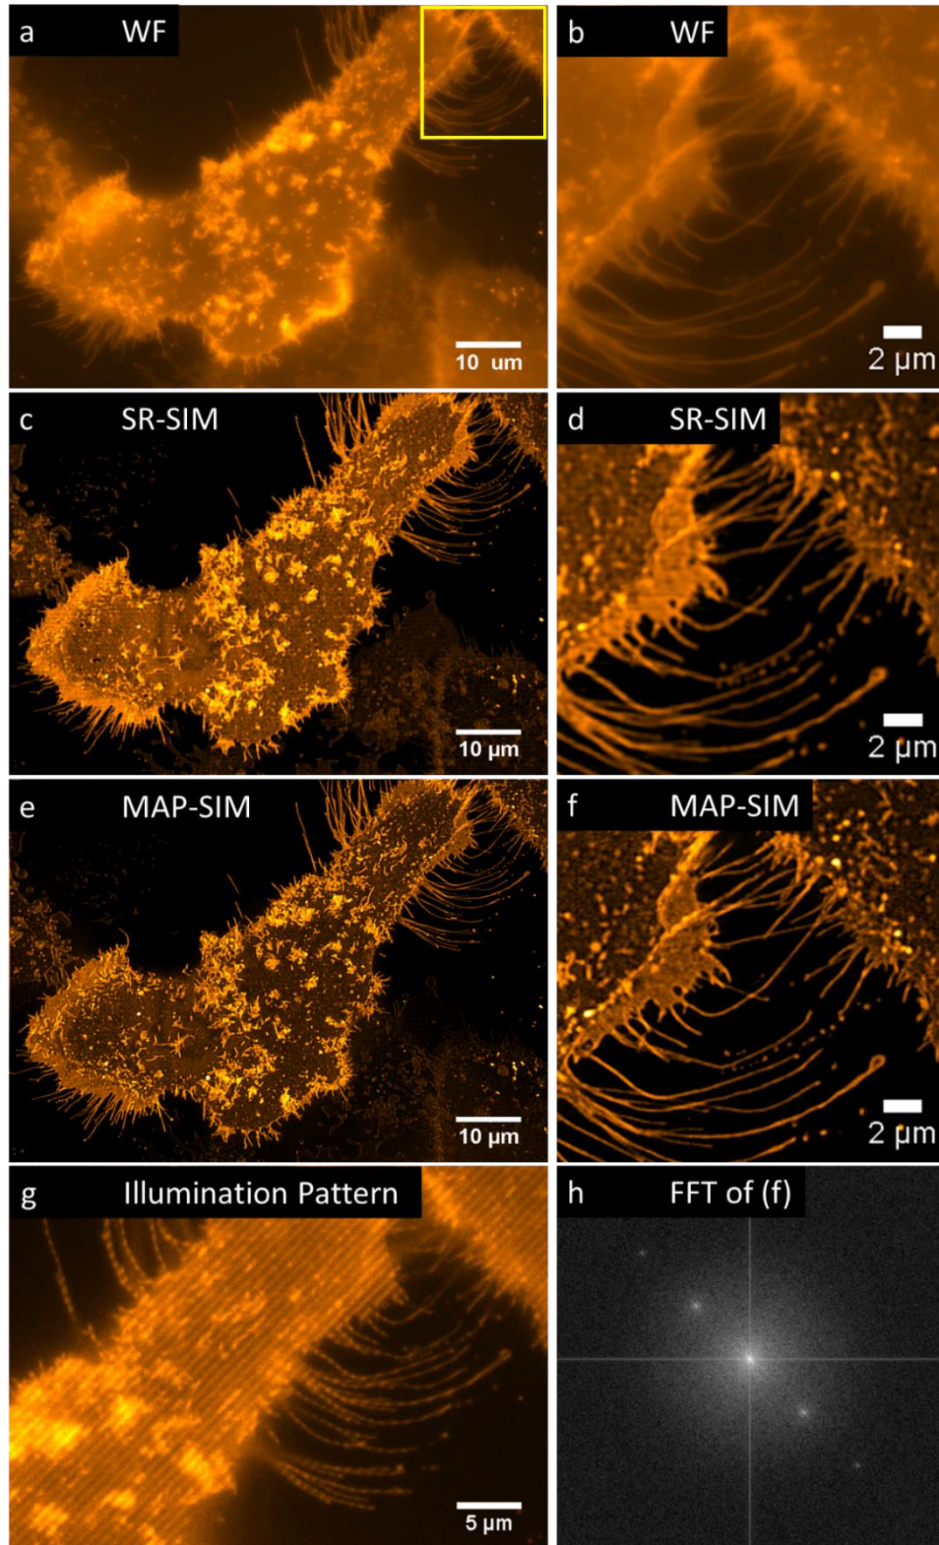



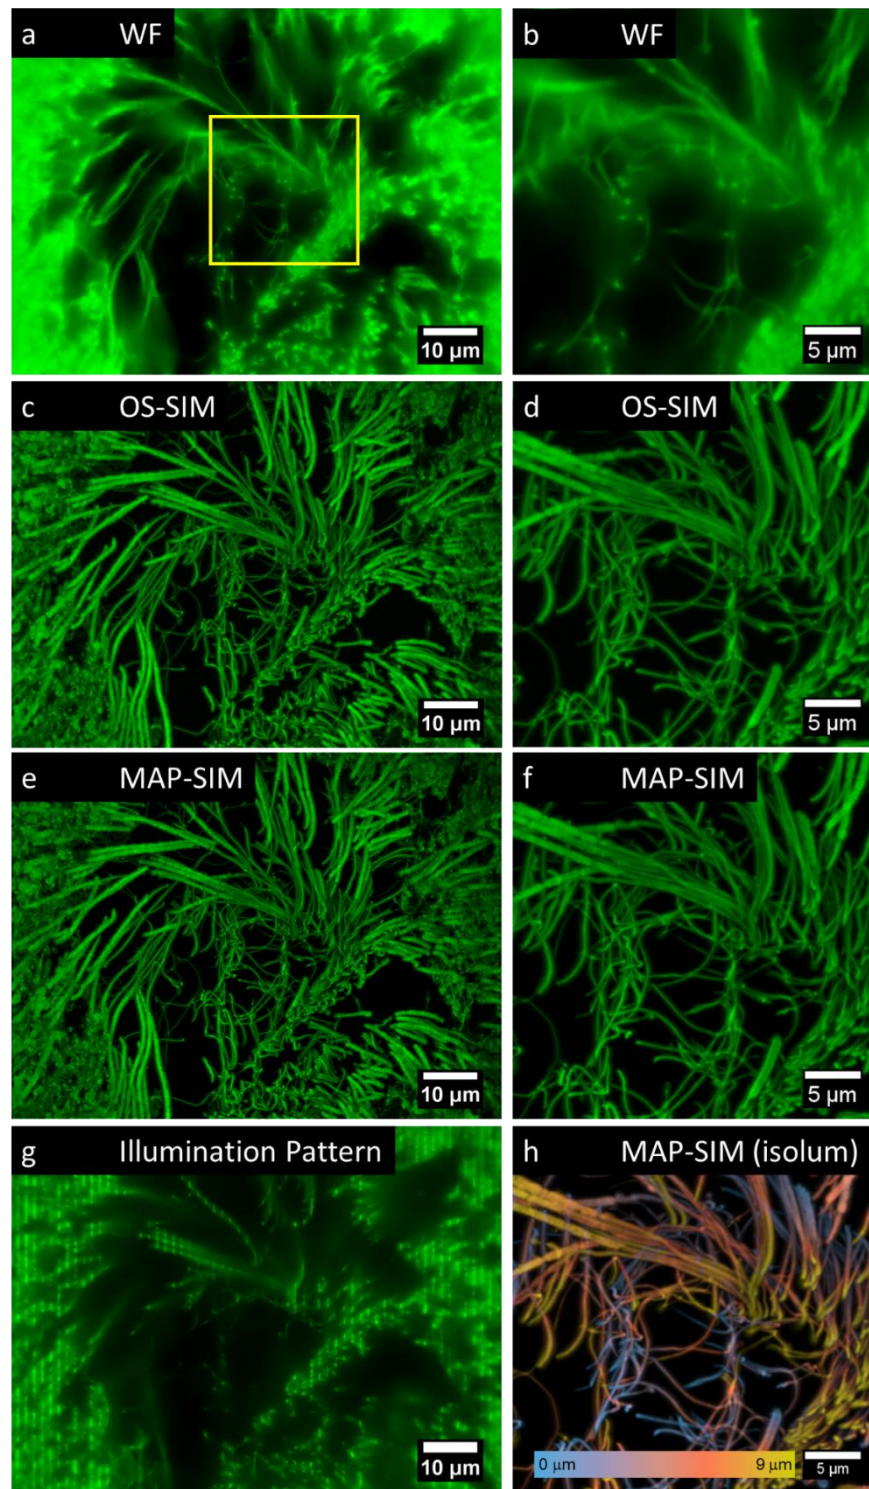

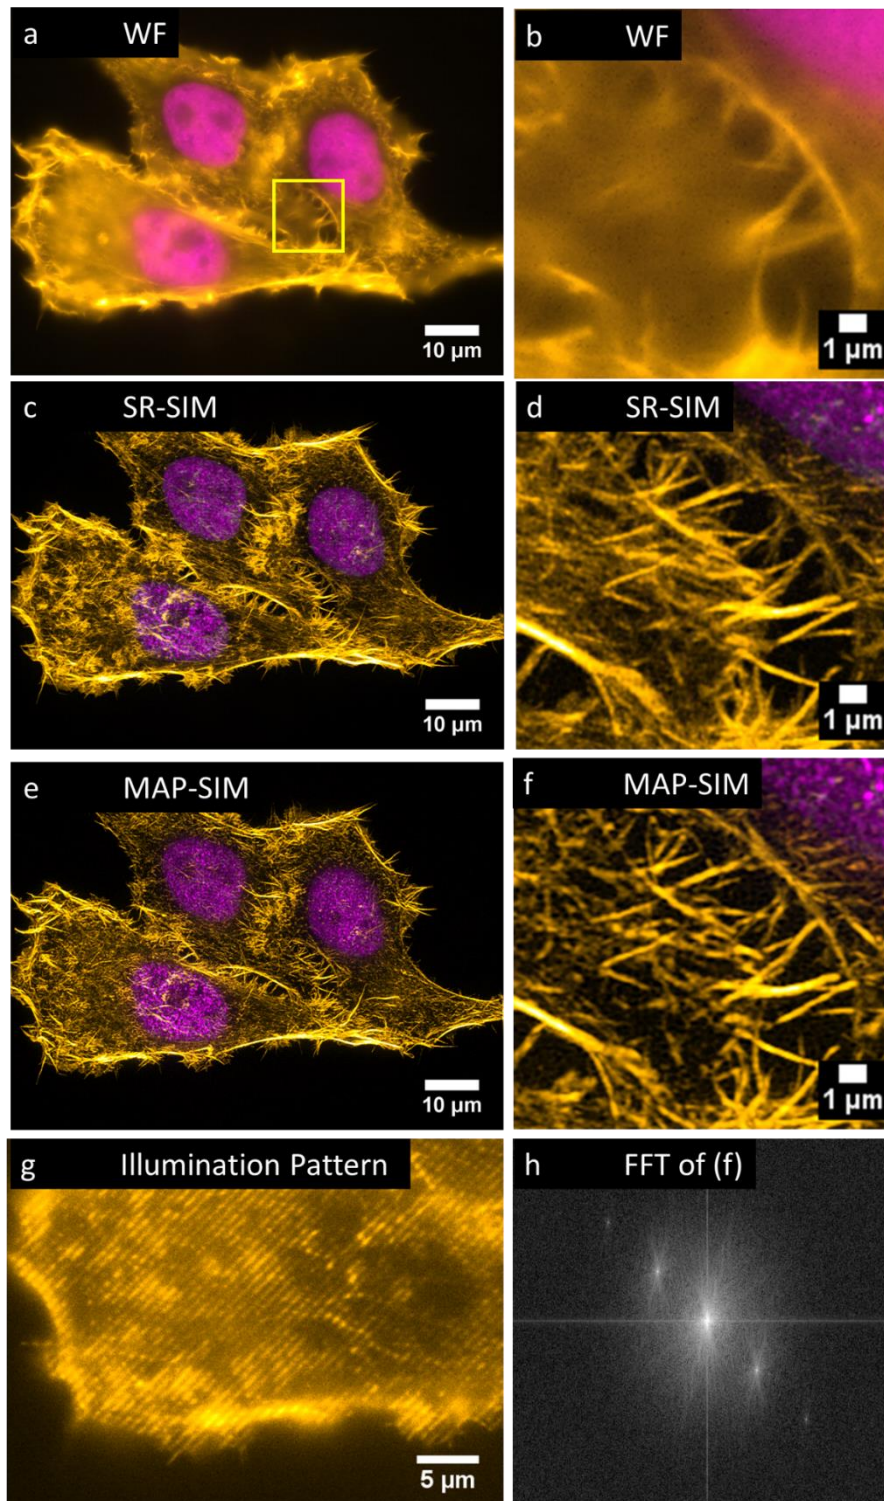



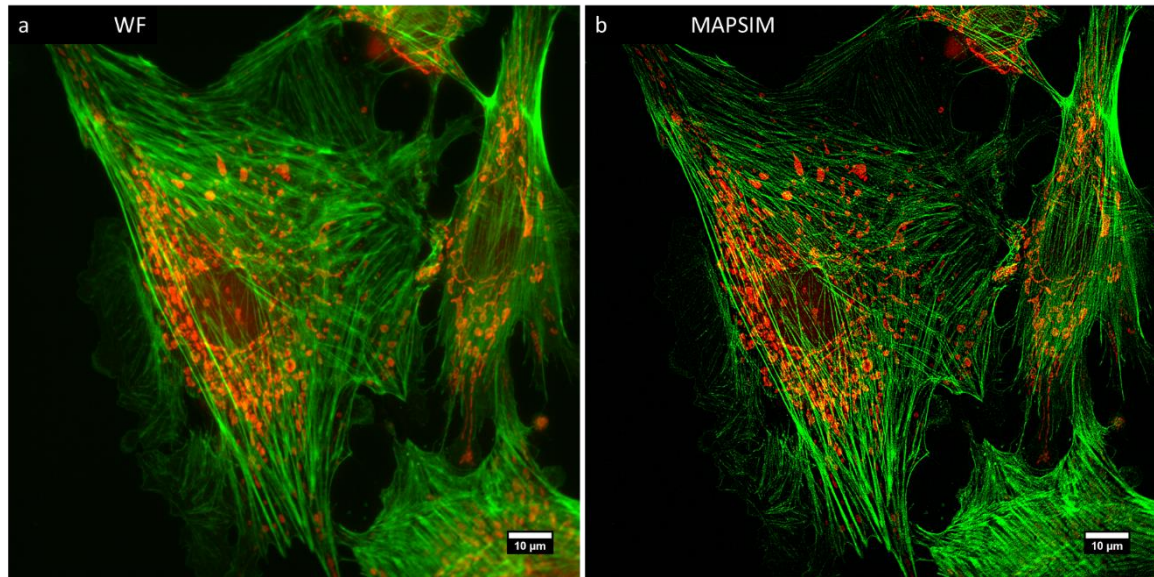



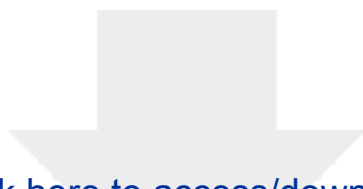

Click here to access/download  
**Supplementary Material**  
Hagen-SIM Supplementary.docx

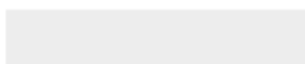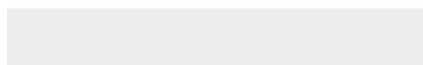

Supplement: giy126_giga-d-18-00276_original_submission.pdf [file giy126_giga-d-18-00276_original_submission.pdf]
