# Supplementary material for: Imaging tissues and cells beyond the diffraction limit with structured illumination microscopy and Bayesian image reconstruction
Source: PubMed Central journal article supplement (PMC6325271; doi:10.1093/gigascience/giy126), 2018-08-23
Supplement: giy126_giga-d-18-00276_revision_1.pdf [file giy126_giga-d-18-00276_revision_1.pdf]

## Imaging tissues and cells beyond the diffraction limit with structured illumination microscopy and Bayesian image reconstruction --Manuscript Draft--

|                                                      |                                                                                                                                                                                                                                                                                                                                                                                                                                                                                                                                                                                                                                                                                                                                                                                                                                                                                                                                                                                                                                                                                                                                                                                                                                                                                                                                                                                                                                                                                                                                                                                                                                                                                                                                                   |                   |
|------------------------------------------------------|---------------------------------------------------------------------------------------------------------------------------------------------------------------------------------------------------------------------------------------------------------------------------------------------------------------------------------------------------------------------------------------------------------------------------------------------------------------------------------------------------------------------------------------------------------------------------------------------------------------------------------------------------------------------------------------------------------------------------------------------------------------------------------------------------------------------------------------------------------------------------------------------------------------------------------------------------------------------------------------------------------------------------------------------------------------------------------------------------------------------------------------------------------------------------------------------------------------------------------------------------------------------------------------------------------------------------------------------------------------------------------------------------------------------------------------------------------------------------------------------------------------------------------------------------------------------------------------------------------------------------------------------------------------------------------------------------------------------------------------------------|-------------------|
| <b>Manuscript Number:</b>                            | GIGA-D-18-00276R1                                                                                                                                                                                                                                                                                                                                                                                                                                                                                                                                                                                                                                                                                                                                                                                                                                                                                                                                                                                                                                                                                                                                                                                                                                                                                                                                                                                                                                                                                                                                                                                                                                                                                                                                 |                   |
| <b>Full Title:</b>                                   | Imaging tissues and cells beyond the diffraction limit with structured illumination microscopy and Bayesian image reconstruction                                                                                                                                                                                                                                                                                                                                                                                                                                                                                                                                                                                                                                                                                                                                                                                                                                                                                                                                                                                                                                                                                                                                                                                                                                                                                                                                                                                                                                                                                                                                                                                                                  |                   |
| <b>Article Type:</b>                                 | Data Note                                                                                                                                                                                                                                                                                                                                                                                                                                                                                                                                                                                                                                                                                                                                                                                                                                                                                                                                                                                                                                                                                                                                                                                                                                                                                                                                                                                                                                                                                                                                                                                                                                                                                                                                         |                   |
| <b>Funding Information:</b>                          | National Institute of General Medical Sciences (1R15GM128166-01)                                                                                                                                                                                                                                                                                                                                                                                                                                                                                                                                                                                                                                                                                                                                                                                                                                                                                                                                                                                                                                                                                                                                                                                                                                                                                                                                                                                                                                                                                                                                                                                                                                                                                  | Dr Guy Hagen      |
|                                                      | National Science Foundation (1727033)                                                                                                                                                                                                                                                                                                                                                                                                                                                                                                                                                                                                                                                                                                                                                                                                                                                                                                                                                                                                                                                                                                                                                                                                                                                                                                                                                                                                                                                                                                                                                                                                                                                                                                             | Dr Guy Hagen      |
|                                                      | SCIEX (13.183)                                                                                                                                                                                                                                                                                                                                                                                                                                                                                                                                                                                                                                                                                                                                                                                                                                                                                                                                                                                                                                                                                                                                                                                                                                                                                                                                                                                                                                                                                                                                                                                                                                                                                                                                    | Dr Tomáš Lukeš    |
|                                                      | České Vysoké Učení Technické v Praze (SGS18/141/OHK3/2T/13)                                                                                                                                                                                                                                                                                                                                                                                                                                                                                                                                                                                                                                                                                                                                                                                                                                                                                                                                                                                                                                                                                                                                                                                                                                                                                                                                                                                                                                                                                                                                                                                                                                                                                       | Mr Jakub Pospíšil |
|                                                      | BioFrontiers Institute, University of Colorado Colorado Springs                                                                                                                                                                                                                                                                                                                                                                                                                                                                                                                                                                                                                                                                                                                                                                                                                                                                                                                                                                                                                                                                                                                                                                                                                                                                                                                                                                                                                                                                                                                                                                                                                                                                                   | Dr Guy Hagen      |
| <b>Abstract:</b>                                     | <p><b>Background</b></p> <p>Structured illumination microscopy (SIM) is a family of methods in optical fluorescence microscopy that can achieve both optical sectioning and super-resolution effects. SIM is a valuable method for high resolution imaging of fixed cells or tissues labeled with conventional fluorophores, as well as for imaging the dynamics of live cells expressing fluorescent protein constructs. In SIM, one acquires a set of images with shifting illumination patterns. This set of images is subsequently treated with image analysis algorithms to produce an image with reduced out-of-focus light (optical sectioning) and/or with improved resolution (super-resolution).</p> <p><b>Findings</b></p> <p>Five complete, freely available SIM datasets are presented including raw and analyzed data. We report methods for image acquisition and analysis using open source software along with examples of the resulting images when processed with different methods. We processed the data using established optical sectioning SIM and super-resolution SIM methods, and with newer Bayesian restoration approaches which we are developing.</p> <p><b>Conclusion</b></p> <p>Various methods for SIM data acquisition and processing are actively being developed, but complete raw data from SIM experiments is not typically published. Publically available, high quality raw data with examples of processed results will aid researchers when developing new methods in SIM. Biologists will also find interest in the high-resolution images of animal tissues and cells we acquired. All of the data was processed with SIMToolbox, an open source and freely available software solution for SIM.</p> |                   |
| <b>Corresponding Author:</b>                         | Guy Hagen<br><br>UNITED STATES                                                                                                                                                                                                                                                                                                                                                                                                                                                                                                                                                                                                                                                                                                                                                                                                                                                                                                                                                                                                                                                                                                                                                                                                                                                                                                                                                                                                                                                                                                                                                                                                                                                                                                                    |                   |
| <b>Corresponding Author Secondary Information:</b>   |                                                                                                                                                                                                                                                                                                                                                                                                                                                                                                                                                                                                                                                                                                                                                                                                                                                                                                                                                                                                                                                                                                                                                                                                                                                                                                                                                                                                                                                                                                                                                                                                                                                                                                                                                   |                   |
| <b>Corresponding Author's Institution:</b>           |                                                                                                                                                                                                                                                                                                                                                                                                                                                                                                                                                                                                                                                                                                                                                                                                                                                                                                                                                                                                                                                                                                                                                                                                                                                                                                                                                                                                                                                                                                                                                                                                                                                                                                                                                   |                   |
| <b>Corresponding Author's Secondary Institution:</b> |                                                                                                                                                                                                                                                                                                                                                                                                                                                                                                                                                                                                                                                                                                                                                                                                                                                                                                                                                                                                                                                                                                                                                                                                                                                                                                                                                                                                                                                                                                                                                                                                                                                                                                                                                   |                   |
| <b>First Author:</b>                                 | Jakub Pospíšil                                                                                                                                                                                                                                                                                                                                                                                                                                                                                                                                                                                                                                                                                                                                                                                                                                                                                                                                                                                                                                                                                                                                                                                                                                                                                                                                                                                                                                                                                                                                                                                                                                                                                                                                    |                   |

|                                                                               |                                                                                                                                                                                                                                                                                                                                                                                                                                                                                                                                                                                                                                                                                                                                                                                                                                                                                                                                                                                                                                                                                                                                                                                                                                                                                                                                                                                                                                                                                                                                                                                                                                                                                                                                                                                                                                                                                                                                                                                                                                                                                                                                                                                                                                                                                                                                                                                                                                   |
|-------------------------------------------------------------------------------|-----------------------------------------------------------------------------------------------------------------------------------------------------------------------------------------------------------------------------------------------------------------------------------------------------------------------------------------------------------------------------------------------------------------------------------------------------------------------------------------------------------------------------------------------------------------------------------------------------------------------------------------------------------------------------------------------------------------------------------------------------------------------------------------------------------------------------------------------------------------------------------------------------------------------------------------------------------------------------------------------------------------------------------------------------------------------------------------------------------------------------------------------------------------------------------------------------------------------------------------------------------------------------------------------------------------------------------------------------------------------------------------------------------------------------------------------------------------------------------------------------------------------------------------------------------------------------------------------------------------------------------------------------------------------------------------------------------------------------------------------------------------------------------------------------------------------------------------------------------------------------------------------------------------------------------------------------------------------------------------------------------------------------------------------------------------------------------------------------------------------------------------------------------------------------------------------------------------------------------------------------------------------------------------------------------------------------------------------------------------------------------------------------------------------------------|
| <b>First Author Secondary Information:</b>                                    |                                                                                                                                                                                                                                                                                                                                                                                                                                                                                                                                                                                                                                                                                                                                                                                                                                                                                                                                                                                                                                                                                                                                                                                                                                                                                                                                                                                                                                                                                                                                                                                                                                                                                                                                                                                                                                                                                                                                                                                                                                                                                                                                                                                                                                                                                                                                                                                                                                   |
| <b>Order of Authors:</b>                                                      | Jakub Pospíšil                                                                                                                                                                                                                                                                                                                                                                                                                                                                                                                                                                                                                                                                                                                                                                                                                                                                                                                                                                                                                                                                                                                                                                                                                                                                                                                                                                                                                                                                                                                                                                                                                                                                                                                                                                                                                                                                                                                                                                                                                                                                                                                                                                                                                                                                                                                                                                                                                    |
|                                                                               | Tomáš Lukeš                                                                                                                                                                                                                                                                                                                                                                                                                                                                                                                                                                                                                                                                                                                                                                                                                                                                                                                                                                                                                                                                                                                                                                                                                                                                                                                                                                                                                                                                                                                                                                                                                                                                                                                                                                                                                                                                                                                                                                                                                                                                                                                                                                                                                                                                                                                                                                                                                       |
|                                                                               | Justin Bendesky                                                                                                                                                                                                                                                                                                                                                                                                                                                                                                                                                                                                                                                                                                                                                                                                                                                                                                                                                                                                                                                                                                                                                                                                                                                                                                                                                                                                                                                                                                                                                                                                                                                                                                                                                                                                                                                                                                                                                                                                                                                                                                                                                                                                                                                                                                                                                                                                                   |
|                                                                               | Karel Fliegel                                                                                                                                                                                                                                                                                                                                                                                                                                                                                                                                                                                                                                                                                                                                                                                                                                                                                                                                                                                                                                                                                                                                                                                                                                                                                                                                                                                                                                                                                                                                                                                                                                                                                                                                                                                                                                                                                                                                                                                                                                                                                                                                                                                                                                                                                                                                                                                                                     |
|                                                                               | Kathrin Spendier                                                                                                                                                                                                                                                                                                                                                                                                                                                                                                                                                                                                                                                                                                                                                                                                                                                                                                                                                                                                                                                                                                                                                                                                                                                                                                                                                                                                                                                                                                                                                                                                                                                                                                                                                                                                                                                                                                                                                                                                                                                                                                                                                                                                                                                                                                                                                                                                                  |
|                                                                               | Guy Hagen                                                                                                                                                                                                                                                                                                                                                                                                                                                                                                                                                                                                                                                                                                                                                                                                                                                                                                                                                                                                                                                                                                                                                                                                                                                                                                                                                                                                                                                                                                                                                                                                                                                                                                                                                                                                                                                                                                                                                                                                                                                                                                                                                                                                                                                                                                                                                                                                                         |
| <b>Order of Authors Secondary Information:</b>                                |                                                                                                                                                                                                                                                                                                                                                                                                                                                                                                                                                                                                                                                                                                                                                                                                                                                                                                                                                                                                                                                                                                                                                                                                                                                                                                                                                                                                                                                                                                                                                                                                                                                                                                                                                                                                                                                                                                                                                                                                                                                                                                                                                                                                                                                                                                                                                                                                                                   |
| <b>Response to Reviewers:</b>                                                 | <p>Dear Editor:</p> <p>We would like to resubmit our manuscript entitled “Imaging tissues and cells beyond the diffraction limit with structured illumination microscopy and Bayesian image reconstruction” for consideration in GigaScience as a data note.</p> <p>We would like to thank the referees for their very positive reviews of the paper. Reviewer 1 had a minor point of concern:</p> <p>“One minor point the authors may want to address is the difference between coherent interference illumination and the incoherent pattern illumination employed in the manuscript. It seems that interference illumination can generate a sin pattern with highest contrast at cutoff frequency while incoherent pattern illumination may suffer from the gradually cutoff of the incoherent OTF.”</p> <p>We thank the reviewer for this comment. The reviewer is correct about this, and we have written some comments and added a new reference in the discussion which should clear up this matter. The modified paragraph now reads:</p> <p>“There are several other advantages to the use incoherent illumination in SIM, including removing the need for a pupil plane mask to block unwanted diffraction orders. Also, incoherent imaging of a microdisplay for pattern formation means that the pattern spatial frequency in the sample plane does not depend on the wavelength of the light which is used. On the other hand, in incoherent illumination SIM such as we used here, the contrast of the illumination pattern decreases with increasing spatial frequency according to the incoherent optical transfer function [53]. In coherent illumination SIM [8,9,11], the coherent optical transfer function applies [53], and so the pattern contrast does not decrease with increasing spatial frequency. This means that coherent illumination SIM can more efficiently mix high resolution information from outside the frequency limit into the detection passband of the microscope, thereby potentially achieving better resolution than what we achieved in this work. We achieved a lateral resolution enhancement factor of ~1.8 (Fig. 2), whereas a factor of 2.0 is expected for coherent illumination SIM.”</p> <p>In addition to this, we have fixed a few typographical errors.</p> <p>We hope that the paper will now be acceptable for publication.</p> <p>Sincerely,</p> <p>Guy M. Hagen</p> |
| <b>Additional Information:</b>                                                |                                                                                                                                                                                                                                                                                                                                                                                                                                                                                                                                                                                                                                                                                                                                                                                                                                                                                                                                                                                                                                                                                                                                                                                                                                                                                                                                                                                                                                                                                                                                                                                                                                                                                                                                                                                                                                                                                                                                                                                                                                                                                                                                                                                                                                                                                                                                                                                                                                   |
| <b>Question</b>                                                               | <b>Response</b>                                                                                                                                                                                                                                                                                                                                                                                                                                                                                                                                                                                                                                                                                                                                                                                                                                                                                                                                                                                                                                                                                                                                                                                                                                                                                                                                                                                                                                                                                                                                                                                                                                                                                                                                                                                                                                                                                                                                                                                                                                                                                                                                                                                                                                                                                                                                                                                                                   |
| Are you submitting this manuscript to a special series or article collection? | No                                                                                                                                                                                                                                                                                                                                                                                                                                                                                                                                                                                                                                                                                                                                                                                                                                                                                                                                                                                                                                                                                                                                                                                                                                                                                                                                                                                                                                                                                                                                                                                                                                                                                                                                                                                                                                                                                                                                                                                                                                                                                                                                                                                                                                                                                                                                                                                                                                |
| <b>Experimental design and statistics</b>                                     | Yes                                                                                                                                                                                                                                                                                                                                                                                                                                                                                                                                                                                                                                                                                                                                                                                                                                                                                                                                                                                                                                                                                                                                                                                                                                                                                                                                                                                                                                                                                                                                                                                                                                                                                                                                                                                                                                                                                                                                                                                                                                                                                                                                                                                                                                                                                                                                                                                                                               |

|                                                                                                                                                                                                                                                                                                                                                                                                                                                                                                                                                         |                                                                                            |
|---------------------------------------------------------------------------------------------------------------------------------------------------------------------------------------------------------------------------------------------------------------------------------------------------------------------------------------------------------------------------------------------------------------------------------------------------------------------------------------------------------------------------------------------------------|--------------------------------------------------------------------------------------------|
| <p>Full details of the experimental design and statistical methods used should be given in the Methods section, as detailed in our <a href="#">Minimum Standards Reporting Checklist</a>. Information essential to interpreting the data presented should be made available in the figure legends.</p> <p>Have you included all the information requested in your manuscript?</p>                                                                                                                                                                       |                                                                                            |
| <p><b>Resources</b></p> <p>A description of all resources used, including antibodies, cell lines, animals and software tools, with enough information to allow them to be uniquely identified, should be included in the Methods section. Authors are strongly encouraged to cite <a href="#">Research Resource Identifiers</a> (RRIDs) for antibodies, model organisms and tools, where possible.</p> <p>Have you included the information requested as detailed in our <a href="#">Minimum Standards Reporting Checklist</a>?</p>                     | <p>Yes</p>                                                                                 |
| <p><b>Availability of data and materials</b></p> <p>All datasets and code on which the conclusions of the paper rely must be either included in your submission or deposited in <a href="#">publicly available repositories</a> (where available and ethically appropriate), referencing such data using a unique identifier in the references and in the “Availability of Data and Materials” section of your manuscript.</p> <p>Have you have met the above requirement as detailed in our <a href="#">Minimum Standards Reporting Checklist</a>?</p> | <p>No</p>                                                                                  |
| <p>If not, please give reasons for any omissions below.</p>                                                                                                                                                                                                                                                                                                                                                                                                                                                                                             | <p>we plan to upload the data to GIGA DB when we are contacted by the Gigascience team</p> |

as follow-up to "**Availability of data and materials**

All datasets and code on which the conclusions of the paper rely must be either included in your submission or deposited in [publicly available repositories](#) (where available and ethically appropriate), referencing such data using a unique identifier in the references and in the "Availability of Data and Materials" section of your manuscript.

Have you have met the above requirement as detailed in our [Minimum Standards Reporting Checklist](#)?

"

[Click here to view linked References](#)

1  
2  
3  
4 **1 Imaging tissues and cells beyond the diffraction limit with structured illumination microscopy**  
5  
6 **2 and Bayesian image reconstruction**

7  
8  
9 **3 Jakub Pospíšil<sup>1</sup>, Tomáš Lukeš<sup>1,2</sup>, Justin Bendesky<sup>3</sup>, Karel Fliegel<sup>1</sup>, Kathrin Spendier<sup>3,4</sup>, and**  
10  
11 **4 Guy M. Hagen<sup>3\*</sup>**

12  
13  
14 <sup>1</sup>Department of Radioelectronics, Faculty of Electrical Engineering, Czech Technical University in  
15  
16 Prague, Technická 2, 16627 Prague 6, Czech Republic.

17  
18 <sup>2</sup>Laboratory of Nanoscale Biology, École Polytechnique Fédérale de Lausanne, CH-1015 Lausanne,  
19  
20 Switzerland.

21  
22 <sup>3</sup>UCCS center for the Biofrontiers Institute, University of Colorado at Colorado Springs, 1420 Austin  
23  
24 Bluffs Parkway, Colorado Springs, Colorado, 80918, USA.

25  
26  
27 <sup>4</sup>Department of Physics and Energy Science, University of Colorado at Colorado Springs, 1420 Austin  
28  
29 Bluffs Parkway, Colorado Springs, Colorado, 80918, USA.

30  
31 **13 Contact email addresses**

32  
33  
34 Jakub Pospíšil, [pospij27@fel.cvut.cz](mailto:pospij27@fel.cvut.cz), ORCID: 0000-0003-3615-5752

35  
36 Tomáš Lukeš [lukestom@fel.cvut.cz](mailto:lukestom@fel.cvut.cz)

37  
38 Justin Bendesky [jbendesk@uccs.edu](mailto:jbendesk@uccs.edu)

39  
40 Karel Fliegel, [fliegek@fel.cvut.cz](mailto:fliegek@fel.cvut.cz), ORCID: 0000-0001-5737-6736

41  
42 Kathrin Spendier, [kspendie@uccs.edu](mailto:kspendie@uccs.edu)

43  
44  
45 Corresponding author, Guy M. Hagen, [ghagen@uccs.edu](mailto:ghagen@uccs.edu), ORCID: 0000-0002-4802-9481

46  
47 **20 Abstract**

48  
49 **21 Background:** Structured illumination microscopy (SIM) is a family of methods in optical fluorescence  
50  
51 microscopy that can achieve both optical sectioning and super-resolution effects. SIM is a valuable  
52  
53 method for high-resolution imaging of fixed cells or tissues labeled with conventional fluorophores, as  
54  
55 well as for imaging the dynamics of live cells expressing fluorescent protein constructs. In SIM, one  
56  
57 acquires a set of images with shifting illumination patterns. This set of images is subsequently treated  
58  
59  
60  
61  
62  
63  
64  
65

1  
2  
3  
4 26 with image analysis algorithms to produce an image with reduced out-of-focus light (optical sectioning)  
5  
6 27 and/or with improved resolution (super-resolution).  
7  
8

9 28 **Findings:** Five complete, freely available SIM datasets are presented including raw and analyzed data.  
10  
11 29 We report methods for image acquisition and analysis using open source software along with examples  
12  
13 30 of the resulting images when processed with different methods. We processed the data using established  
14  
15 31 optical sectioning SIM and super-resolution SIM methods, and with newer Bayesian restoration  
16  
17 32 approaches which we are developing.  
18

19  
20 33 **Conclusion:** Various methods for SIM data acquisition and processing are actively being developed, but  
21  
22 34 complete raw data from SIM experiments is not typically published. Publically available, high quality  
23  
24 35 raw data with examples of processed results will aid researchers when developing new methods in SIM.  
25  
26 36 Biologists will also find interest in the high-resolution images of animal tissues and cells we acquired.  
27  
28 37 All of the data was processed with SIMToolbox, an open source and freely available software solution  
29  
30 38 for SIM.  
31  
32

33 39 **Keywords:** super-resolution microscopy, SIMToolbox, structured illumination microscopy, open-source  
34  
35 40 software, fluorescence, Bayesian methods, LAMP1, live cell imaging.  
36  
37

## 38 41 **Data description**

### 39 42 **Context**

40 43 Several methods are now available which are able to extend the resolution of fluorescence microscopy  
41  
42 44 beyond the diffraction limit. These methods include photoactivated localization microscopy [1,2]  
43  
44 45 (PALM, FPALM), stochastic optical reconstruction microscopy [3,4] (STORM, dSTORM), super-  
45  
46 46 resolution optical fluctuation imaging [5,6] (SOFI), stimulated emission depletion microscopy [7]  
47  
48 47 (STED), and structured illumination microscopy [8,9] (SIM).  
49  
50

51 48 Of these various methods, SIM is usually regarded as the most useful for imaging live cells, and  
52  
53 49 this method has rapidly gained in popularity. Depending on the optical setup and data processing method  
54  
55 50 used, SIM can achieve optical sectioning (OS-SIM) [10], an effect which greatly reduces out-of-focus  
56  
57  
58  
59  
60  
61  
62  
63  
64  
65

1  
2  
3  
4  
5  
6  
7  
8  
9  
10  
11  
12  
13  
14  
15  
16  
17  
18  
19  
20  
21  
22  
23  
24  
25  
26  
27  
28  
29  
30  
31  
32  
33  
34  
35  
36  
37  
38  
39  
40  
41  
42  
43  
44  
45  
46  
47  
48  
49  
50  
51  
52  
53  
54  
55  
56  
57  
58  
59  
60  
61  
62  
63  
64  
65

light similar to laser scanning confocal fluorescence microscopy. SIM can also be used for imaging beyond the diffraction limit in fluorescence microscopy. Super-resolution SIM (SR-SIM) [8,9], in its most common implementation [11], uses laser illumination to create a high frequency interference fringe pattern (close to or at the resolution limit of the microscope) to illuminate the sample. In such an experiment, image information with details beyond the limit of spatial frequencies accepted by the microscope is aliased into the acquired images. By acquiring multiple images with shifting illumination patterns, a high-resolution image can be reconstructed [8,9]. Two-dimensional SR-SIM enables a twofold resolution improvement in the lateral dimension [8,9,12,13]. If a three-dimensional illumination pattern is used, a twofold resolution improvement can also be realized in the axial direction [11,14,15]. SIM is perhaps the most attractive super-resolution method for imaging live cells because it does not require high illumination powers, can work with most dyes and fluorescent proteins, uses efficient widefield (WF) detection, and can achieve high imaging rates. SIM has been demonstrated in several applications, including 2D [12,13], and 3D imaging [14,16].

As interest in super-resolution imaging has increased, several alternative approaches for SIM have been introduced which use various kinds of patterned illumination [17–21]. For example, in multifocal structured illumination microscopy (MSIM) [17], a 2D array of focused laser spots is scanned across a sample, and subsequent image processing is used to achieve an image with improved resolution. Structured illumination methods have also been combined with light sheet excitation, a method ideal for imaging live cells [22–26].

In addition to new illumination schemes, alternative data processing methods have also been introduced [27–33]. For example, Orioux et al. suggested a 2D method for SIM reconstruction based on Bayesian estimation [28], and our group showed that Bayesian reconstruction methods in SIM have several potential advantages and can achieve a performance comparable to traditional SIM methods [29]. To allow 3D imaging, our group subsequently introduced maximum *a posteriori* probability SIM (MAP-SIM [30]), a method based on reconstruction of the SIM data using a Bayesian framework. Image

1  
2  
3  
4 76 restoration approaches are useful when working with low signal levels in SIM [34], and have been  
5  
6  
7 77 recently reviewed [35].  
8

9 78 We present complete raw and analyzed SIM data from several different situations in cell biology  
10  
11 79 studies in which we imaged both live and fixed mammalian cells as well as fixed tissues. We used an  
12  
13 80 alternative approach for SIM illumination which has been previously described [30,36,37]. Our system  
14  
15 81 uses either light emitting diode (LED) or laser illumination, and a fast ferroelectric liquid crystal-on-  
16  
17 82 silicon (FLCOS) microdisplay (also known as a spatial light modulator (SLM)) for SIM pattern  
18  
19 83 definition. SLMs have seen use in SIM and related applications when high speed imaging and flexibility  
20  
21 84 in controlling the spatial and temporal properties of the illumination are priorities [12–14,16,25,37–43].  
22  
23 85 To analyze the data we used OS-SIM, SR-SIM, and MAP-SIM methods. All of the raw and analyzed  
24  
25 86 data are available on GigaDB, and the analysis software (SIMToolbox) is open-source and freely  
26  
27 87 available [36].  
28  
29

## 30 31 88 **Methods**

### 32 33 89 *Cell lines and reagents*

34  
35 90 All cell lines used were maintained in DMEM supplemented with 10% FCS, 100 U/ml penicillin, 100  
36  
37 91 U/ml streptomycin, and L-glutamate (Invitrogen) at 37 °C and 100% humidity. Cell lines we used for this  
38  
39 92 study included U2-OS (human bone sarcoma, RRID:CVCL\_0042), A431 (human skin carcinoma,  
40  
41 93 RRID:CVCL\_0037), and Hep-G2 (human liver carcinoma, RRID:CVCL\_0027).  
42  
43

### 44 45 94 *Preparation of samples for imaging*

46  
47 95 (SIM data 1, Fig. 4) U2-OS cells expressing lysosome-associated membrane protein 1 labeled with green  
48  
49 96 fluorescent protein (LAMP1-GFP) were grown in petri dishes with coverslip bottoms (MatTek) for 24  
50  
51 97 hours, then imaged them in full medium at room temperature. In this experiment, we used microscopy  
52  
53 98 system 1 (Olympus IX71, Table 2).  
54  
55

56 99 (SIM data 2, Fig. 5) A431 cells were grown on #1.5H coverslips (Marienfeld) for 48 hours in  
57  
58 100 normal medium. We washed the cells once with phosphate buffered saline (PBS), pH 7.4, and then  
59  
60  
61  
62  
63  
64  
65



1  
2  
3  
4  
5  
6  
7  
8  
9  
10  
11  
12  
13  
14  
15  
16  
17  
18  
19  
20  
21  
22  
23  
24  
25  
26  
27  
28  
29  
30  
31  
32  
33  
34  
35  
36  
37  
38  
39  
40  
41  
42  
43  
44  
45  
46  
47  
48  
49  
50  
51  
52  
53  
54  
55  
56  
57  
58  
59  
60  
61  
62  
63  
64  
65

101 treated the cells with 5  $\mu$ M DiI-C<sub>16</sub> (Molecular Probes) in PBS at room temperature for 5 minutes. This  
102 probe is a lipid modified with a fluorescent dye that inserts into the plasma membrane of live mammalian  
103 cells within a few minutes. We then washed the cells twice with PBS, then imaged them on the SIM  
104 system in fresh PBS at room temperature using a coverslip chamber (Biotech). In this experiment, we  
105 used microscopy system 3 (Leica DMI8, Table 2).

106 (SIM data 3, Fig. 6) A prepared slide was acquired (AmScope) containing sectioned rabbit testis  
107 stained with hematoxylin and eosin (H&E). In this experiment, we used microscopy system 3 (Leica  
108 DMI8, Table 2).

109 (SIM data 4, Fig. 7) Hep-G2 cells expressing Dendra2-histone 4 [44] were grown on #1.5H  
110 coverslips for 24 hours, then fixed for 15 minutes at room temperature with 4% paraformaldehyde. We  
111 then permeabilized the cells for 5 minutes at room temperature with 0.1% triton-X100, then washed the  
112 cells with PBS. We then labeled the actin cytoskeleton of the cells for 1 hour at room temperature with 5  
113 nM Atto 565 phalloidin, followed by washing the cells with PBS. We finally mounted the coverslips on  
114 clean slides using mowiol 4-88 (Fluka). In this experiment, we used microscopy system 1 (Olympus  
115 IX71, Table 2).

116 (SIM data 5, Fig. 8) A prepared slide was acquired (Molecular Probes) containing bovine  
117 pulmonary endothelial (BPAE) cells stained with Alexa Fluor 488 phalloidin (to label the actin  
118 cytoskeleton) and Mitotracker CMXRos (to label mitochondria). In this experiment, we used microscopy  
119 system 2 (Olympus IX83, Table 2).

120 Table 1 summarizes the imaging parameters used for the different samples.

### 121 *Microscope setup and acquisition*

122 We used three different home-built SIM setups based on the same general design as described  
123 previously [30,36,37] (Figure 1). The three SIM systems were based on Olympus IX71, Olympus IX83,  
124 and Leica DMI8 microscopes coupled with sCMOS cameras (Andor) under the control of IQ3 software  
125 (Andor). The parameters of the different microscope setups are shown in Table 2.

1  
2  
3  
4  
5 126 In each microscope setup, the illumination patterns were produced by a high-speed ferroelectric  
6  
7 127 liquid crystal on silicon (FLCOS) microdisplay (SXGA-3DM, Forth Dimension Displays, 13.6  $\mu\text{m}$  pixel  
8  
9 128 pitch). This particular FLCOS microdisplay has been used previously in SIM [14,16,25,29,30,36,37,45–  
10  
11 129 48], and in other optical sectioning systems such as programmable array microscopy (PAM) [38,42,49].  
12  
13 130 The display was illuminated by a home-built, three channel LED system based on high power LEDs (PT-  
14  
15 131 54 or PT-120 with DK-114N or DK-136M controller, Luminous Devices) with emission maxima at  
16  
17 132 460 nm, 525 nm, and 623 nm. The output of each LED was filtered with a band pass filter (Chroma), and  
18  
19 133 the three wavelengths were combined with appropriate dichroic mirrors (Chroma). The light was then  
20  
21 134 vertically polarized with a linear polarizer (Edmund Optics). We imaged the microdisplay into the  
22  
23 135 microscope using an external tube lens (Table 2) and polarizing beam splitter cube (Thor Labs). With any  
24  
25 136 of the setups and when using a 100 $\times$  objective, single microdisplay pixels are imaged into the sample  
26  
27 137 with a nominal size of 136 nm, thus as diffraction-limited spots. This is important for achieving the  
28  
29 138 highest resolution results [37]. More details are available in the supplementary material of [36]. In one  
30  
31 139 experiment (Figure 8) we used a Spectra-X light source (Lumencor).

32  
33  
34  
35  
36 140 The microdisplay allows one to create any desired illumination pattern. In our experiments, the  
37  
38 141 illumination masks consisted of line grids of different orientations ( $0^\circ$ ,  $90^\circ$ ,  $45^\circ$  and  $135^\circ$ ). The lines were  
39  
40 142 one microdisplay pixel thick (diffraction limited in the sample when using a 100 $\times$  objective) with a gap  
41  
42 143 of “off” pixels in between. The illumination line grid was shifted by one pixel between each image  
43  
44 144 acquisition to obtain a shifted illumination mask. The shift between each image was constant, and the  
45  
46 145 sum of all illumination masks resulted in homogenous illumination. Our optical setup, in which an  
47  
48 146 incoherently illuminated microdisplay is imaged into the sample with highly corrected microscope optics,  
49  
50 147 results in much more stable SIM illumination parameters compared to conventional SIM in which the  
51  
52 148 illumination pattern is created by laser interference. We use a unique spatial calibration method to  
53  
54 149 determine, with very high accuracy, the position of the patterned illumination in the sample [37]. This is  
55  
56  
57  
58  
59  
60  
61  
62  
63  
64  
65

1  
2  
3  
4 150 a spatial domain process and does not rely on fitting of data to a model except for the assumption that the  
5  
6  
7 151 imaging is linear and shift-invariant.  
8

9 152 **Insert Figure 1**

10  
11 153 **Table 1 Imaging parameters for the SIM datasets**

| Data                | sample              | Label (structure)                                                      | Pixel size, nm | Illumination                           | Exposure time, ms | SIM experiment type | SIM pattern # of angles/phases | Microscope system used |
|---------------------|---------------------|------------------------------------------------------------------------|----------------|----------------------------------------|-------------------|---------------------|--------------------------------|------------------------|
| SIM data 1 (Fig. 4) | Live U2-OS cells    | LAMP1-GFP (lysosomes and membrane)                                     | 65             | LED 480 nm                             | 25                | 2D time lapse       | 1/11                           | 1                      |
| SIM data 2 (Fig. 5) | Live A431 cells     | Dil-C16 (membrane)                                                     | 65             | LED 530 nm                             | 100               | 3D                  | 4/24                           | 3                      |
| SIM data 3 (Fig. 6) | Fixed rabbit testis | Hematoxylin and eosin (structural strain)                              | 65             | LED 530 nm                             | 200               | 3D                  | 1/11                           | 3                      |
| SIM data 4 (Fig. 7) | Fixed Hep-G2 cells  | Dendra2-H4 (nucleus)<br>Atto565-phalloidin (actin)                     | 65             | LED 480 nm<br>LED 530 nm               | 500               | 3D                  | 4/24                           | 1                      |
| SIM data 5 (Fig. 8) | Fixed BPAE cells    | AlexaFluor 488 phalloidin (actin)<br>Mitotracker CMXRos (mitochondria) | 65             | Lumencor spectra-X<br>470 nm<br>550 nm | 300               | 2D                  | 1/11                           | 2                      |

14  
15  
16  
17  
18  
19  
20  
21  
22  
23  
24  
25  
26  
27  
28  
29  
30  
31  
32  
33  
34 154

35  
36 155 **Table 2 Parameters of the microscope systems**

| Setup | Microscope   | Objective                | sCMOS Camera    | Illumination tube lens focal length and part number |
|-------|--------------|--------------------------|-----------------|-----------------------------------------------------|
| 1     | Olympus IX71 | 100x/1.4 UPLSAPO         | Andor Neo 5.5   | 180 mm U-TLU                                        |
| 2     | Olympus IX83 | 100x/1.3 UPLFLN          | Andor Zyla 4.2+ | 180 mm SWTLU-C                                      |
| 3     | Leica DMI8   | 100x/1.47 HCX PLAPO TIRF | Andor Zyla 4.2+ | 200 mm 11525408                                     |

37  
38  
39  
40  
41  
42  
43  
44  
45  
46 156

47  
48 157 *Data processing methods*

49  
50 158 We processed all of the data presented here using SIMToolbox, an open source, user friendly, and freely  
51  
52  
53 159 available program which our group developed for processing SIM data [36]. SIMToolbox, sample data,  
54  
55 160 and complete documentation are freely available (<http://mmtg.fel.cvut.cz/SIMToolbox>). SIMToolbox is  
56  
57 161 capable of OS-SIM [10,37], SR-SIM [8,9], and MAP-SIM [30] methods. See the supplementary  
58  
59 162 information for additional details about these methods.  
60  
61  
62  
63  
64  
65

1  
2  
3  
4  
5  
6  
7  
8  
9  
10  
11  
12  
13  
14  
15  
16  
17  
18  
19  
20  
21  
22  
23  
24  
25  
26  
27  
28  
29  
30  
31  
32  
33  
34  
35  
36  
37  
38  
39  
40  
41  
42  
43  
44  
45  
46  
47  
48  
49  
50  
51  
52  
53  
54  
55  
56  
57  
58  
59  
60  
61  
62  
63  
64  
65

163 *Resolution measurements - spatial domain method*

164 Previously, we used microscopy setup 1 (Olympus IX71) to measure spatial resolution by averaging  
165 spatial measurements from fifty individual 100 nm fluorescent beads [30]. We used a 100×/1.40 NA oil  
166 immersion objective and 460 nm LED excitation (emission 500 - 550 nm). A 19 × 19 pixel region of  
167 interest (ROI) was selected around each bead in both the widefield and MAP-SIM images. The ROIs  
168 were then registered with sub-pixel accuracy using normalized cross-correlation. Each ROI was fit with  
169 a Gaussian function and the full width at half maximum (FWHM) was determined in the axial and lateral  
170 directions. Figure 2 shows the resulting averaged FWHM values and PSF cross-sections [30].

171 **Insert Figure 2**

172 *Resolution measurements - frequency domain method*

173 It is desirable to measure the actual resolution achieved in SIM images (or image sequences) of cells or  
174 tissues, but suitable structures are not always present in the images. We therefore developed a robust  
175 frequency domain method which can be used to measure resolution in any fluorescence microscopy  
176 image [50].

177 The power spectral density (PSD) describes the distribution of the power of a signal with respect  
178 to its frequency. The PSD of an image is the squared magnitude of its Fourier transform, and can be  
179 written as

$$\text{PSD}(k,l) = |\mathcal{F}\{I(m,n)\}|^2 \quad (1)$$

181 where  $\mathcal{F}$  represents the Fourier transform,  $I(m,n)$  is the image intensity,  $m,n$  indexes the rows and  
182 columns of the 2D image, respectively, and  $(k,l)$  are coordinates in the frequency domain. In polar  
183 coordinates, the circularly averaged PSD ( $\text{PSD}_{\text{ca}}$ ) in frequency space with frequency  $q$  and angle  $\theta$  is  
184 given as

$$\text{PSD}_{\text{ca}} = 10 \cdot \log_{10} \left( \frac{1}{N_q} \sum_{\theta} \text{PSD}(q,\theta) \right) \quad (2)$$

1  
2  
3  
4  
5  
6  
7  
8  
9  
10  
11  
12  
13  
14  
15  
16  
17  
18  
19  
20  
21  
22  
23  
24  
25  
26  
27  
28  
29  
30  
31  
32  
33  
34  
35  
36  
37  
38  
39  
40  
41  
42  
43  
44  
45  
46  
47  
48  
49  
50  
51  
52  
53  
54  
55  
56  
57  
58  
59  
60  
61  
62  
63  
64  
65

186 which averages PSD at spatial frequency  $q$ .  $N_q$  is the number of pixels at a particular frequency  $q$ . The  
187 resolution limit in real space corresponds to the cut-off frequency in Fourier space. Assuming a noiseless  
188 case, the cut-off frequency will be equal to the spatial frequency at which  $\text{PSD}_{\text{ca}}$  drops to zero. In  
189 practice,  $\text{PSD}_{\text{ca}}$  contains non-zero values over the whole frequency range caused by noise. The signal to  
190 noise ratio (SNR) in Fourier space is generally very low close to the cut-off frequency, which makes  
191 precise detection of the cut-off frequency challenging. For this we use a spectral subtraction method [50].  
192 Assuming additive noise, in the frequency domain we can write

$$\tilde{X}(k) = Y(k) - E[N(k)] \tag{3}$$

194 where  $Y$ ,  $\tilde{X}$ , and  $E[N(k)]$  represent the noisy signal, the desired signal, and the noise spectrum estimate  
195 (expected noise spectrum), respectively. The noise spectrum  $|N(k)|$  is estimated from the parts of signal  
196 where only noise is present. If the spatial sampling is high enough to fulfill the Nyquist–Shannon  
197 criterion and oversamples the resolution limit of the reconstructed SIM image, spatial frequencies close  
198 to the half of the sampling frequency do not contain useful signal and can be used for noise estimation.  
199 We varied the frequency cut-off threshold over the range  $\langle 0.95f_{\text{max}}; f_{\text{max}} \rangle$ , estimated the level of noise for  
200 every threshold value, and obtained the mean and variance of the cut-off frequency (i.e. the resolution  
201 estimate). The  $f_{\text{max}}$  is given by  $f_{\text{max}} = f_s/2 = 1/2p_{xy}$ , where  $f_s$  and  $p_{xy}$  are the sampling frequency and the  
202 backprojected pixel size, respectively.

203 Figure 3 shows the  $\text{PSD}_{\text{ca}}$  and corresponding resolution limit measured for the data shown in Fig.  
204 5. Using our resolution estimation algorithm, we calculated a lateral spatial resolution of 294 nm for WF,  
205 and 141 nm for MAP-SIM. The measured resolution is in approximate agreement with our results  
206 measured on 100 nm fluorescent beads (Fig. 2).

207 **Insert Figure 3**

1  
2  
3  
4 208 *Imaging live cells, fixed cells, and tissues with SIM*

5  
6  
7 209 To demonstrate the utility of our approach in imaging live cells, we imaged U2-OS cells that had been  
8  
9 210 transfected with GFP-tagged lysosomal associated membrane protein (LAMP1-GFP). LAMP1 is a highly  
10  
11 211 glycosylated protein which is found on the surface of lysosomes and in the plasma membrane [51]. Fig. 4  
12  
13 212 shows widefield, OS-SIM, and MAP-SIM images of U2-OS cells expressing LAMP1-GFP, and the fast  
14  
15 213 Fourier transform (FFT) of each image. The dotted circles in Fig. 4(d-f) show the approximate limit of  
16  
17 214 resolution in each image. We found that, in addition to lysosomal expression, LAMP1-GFP is also  
18  
19 215 present in high concentrations in the plasma membrane of U2-OS cells.

20  
21  
22 216 In this experiment, we acquired SIM image sequences with an exposure time of 25 ms, a raw  
23  
24 217 imaging rate of 40 Hz. We used a SIM pattern with 11 phases (pattern period in the sample plane 1.5  $\mu\text{m}$ )  
25  
26 218 and a single angle ( $0^\circ$  with respect to the camera), acquiring 3982 total frames, resulting in 472 processed  
27  
28 219 frames (see table 1). The imaging rate of processed result frames was therefore 3.6 Hz. The full image  
29  
30 220 sequence is available at [http://mmtg.fel.cvut.cz/mapsimlive\\_suppl/](http://mmtg.fel.cvut.cz/mapsimlive_suppl/) and also available at GigaDB[52].  
31  
32 221 We further analyzed this data as shown in the supplementary material (Figure S2-S3).

33  
34 222 **Insert Figure 4**

35  
36  
37  
38 223 We next imaged live A431 cells which we labeled with the fluorescent lipid DiI-C16. In this experiment  
39  
40 224 we acquired SIM image sequences with an exposure time of 100 ms, a raw imaging rate of 10 Hz. We  
41  
42 225 used a SIM pattern with 24 total phases and four angles (see table 1). This data is shown in Figure 5.

43  
44 226 **Insert Figure 5**

45  
46  
47 227 Figure 6 shows SIM imaging of fixed tissues, in this case the seminiferous tubule of the rabbit stained  
48  
49 228 with hematoxylin and eosin.

50  
51 229 **Insert Figure 6**

52  
53 230 Figure 7 shows SIM imaging of fixed HEPG2 cells expressing H4-Dendra, a nuclear marker. We also  
54  
55 231 stained the cells with Atto 532-phalloidin to label the actin cytoskeleton.

56  
57  
58 232 **Insert Figure 7**  
59  
60  
61  
62  
63  
64  
65

1  
2  
3  
4  
5  
6  
7  
8  
9  
10  
11  
12  
13  
14  
15  
16  
17  
18  
19  
20  
21  
22  
23  
24  
25  
26  
27  
28  
29  
30  
31  
32  
33  
34  
35  
36  
37  
38  
39  
40  
41  
42  
43  
44  
45  
46  
47  
48  
49  
50  
51  
52  
53  
54  
55  
56  
57  
58  
59  
60  
61  
62  
63  
64  
65

233 Figure 8 shows SIM imaging of fixed BPAE cells labeled with Alexa 488-phalloidin and mitotracker  
234 CMXRos to visualize the actin cytoskeleton and mitochondria, respectively.

235 **Insert Figure 8**

## 236 **5. Discussion**

237 SIM results sometimes suffer from artifacts related to the illumination pattern. The artifacts, which can  
238 be severe and are a cause for concern, can be due to several factors including illumination pattern phase  
239 instability and pattern distortion because of refractive index mismatch between the sample and the  
240 immersion fluid. In our hands, MAP-SIM results do not suffer from detectable patterned artifacts, Fig.  
241 4(c), and the FFT of the MAP-SIM result is free of noticeable spurious peaks, Fig. 4(f). We attribute this  
242 to several factors, primarily the use of incoherent illumination together with a FLCOS microdisplay for  
243 pattern generation. This, combined with precise synchronization of the SIM system helps eliminate  
244 patterned artifacts. Additional artifacts in SIM images can arise due to the detector. In sCMOS cameras  
245 like the one we used, each pixel reads out through its own amplifier and as such, each pixel exhibits a  
246 different gain. While very minor, such artifacts can be corrected using a variance stabilization method as  
247 has been introduced for single molecule localization microscopy [53].

248 There are several other advantages to the use incoherent illumination in SIM, including removing the  
249 need for a pupil plane mask to block unwanted diffraction orders. Also, incoherent imaging of a  
250 microdisplay for pattern formation means that the pattern spatial frequency in the sample plane does not  
251 depend on the wavelength of the light which is used. On the other hand, in incoherent illumination SIM  
252 such as we used here, the contrast of the illumination pattern decreases with increasing spatial frequency  
253 according to the incoherent optical transfer function [54]. In coherent illumination SIM [8,9,11], the  
254 coherent optical transfer function applies [54], and so the pattern contrast does not decrease with  
255 increasing spatial frequency. This means that coherent illumination SIM can more efficiently mix high  
256 resolution information from outside the frequency limit into the detection passband of the microscope,  
257 thereby potentially achieving better resolution than what we achieved in this work. We achieved a lateral

1  
2  
3  
4 258 resolution enhancement factor of  $\sim 1.8$  (Fig. 2), whereas a factor of 2.0 is expected for coherent  
5  
6 259 illumination SIM.  
7  
8

9 260 The FLCOS microdisplay (and vendor-supplied microdisplay-timing program) we used can display  
10  
11 261 an illumination pattern and switch to the next pattern in the sequence in 1.14 ms, allowing unprocessed  
12  
13 262 SIM images to be acquired at rates of approximately 875 Hz. However, such rapid imaging is not useful  
14  
15 263 if the reconstructed SIM images are of poor quality, for example if they suffer from low signal to noise  
16  
17 264 ratios. Specifying the fastest possible acquisition rate is inadequate without consideration of the  
18  
19 265 resolution and SNR of the results. Our resolution analysis shown in Figs. 2-4 (see also supplementary  
20  
21 266 figure 4) uses measured quantities to evaluate SIM results and thereby helps to make realistic conclusions  
22  
23  
24 267 about imaging speeds.  
25  
26

## 27 268 **6. Re-use potential**

28  
29 269 The presented SIM datasets can be reused in several ways. Researchers investigating SIM reconstruction  
30  
31 270 algorithms can use the datasets to compare their results with those presented here, including the newer  
32  
33 271 method MAP-SIM. Also, the data may be further analyzed in other ways. One possibility is shown in the  
34  
35 272 supplementary material (part 2: single particle tracking experiments in LAMP1-GFP cells.) Here, we  
36  
37 273 used single particle tracking methods to study the mobility of lysosomes within U2-OS cells.  
38  
39

## 40 274 **Availability of source code and requirements**

41  
42 275 Project name: SIMToolbox v1.3  
43

44  
45 276 Project home page: <http://mmtg.fel.cvut.cz/SIMToolbox/>  
46

47 277 Operating system: platform independent  
48

49 278 Programming language: MATLAB  
50

51 279 License: GNU General Public License v3.0  
52

## 53 280 **Detailed software compatibility notes**

54  
55  
56 281 The SIMToolbox GUI was compiled with MATLAB 2015a and tested in Windows 7 and 8. The GUI is a  
57  
58 282 stand-alone program and does not require MATLAB to be installed. To use the MATLAB functions  
59  
60  
61  
62  
63  
64  
65



1  
2  
3  
4  
5  
6  
7  
8  
9  
10  
11  
12  
13  
14  
15  
16  
17  
18  
19  
20  
21  
22  
23  
24  
25  
26  
27  
28  
29  
30  
31  
32  
33  
34  
35  
36  
37  
38  
39  
40  
41  
42  
43  
44  
45  
46  
47  
48  
49  
50  
51  
52  
53  
54  
55  
56  
57  
58  
59  
60  
61  
62  
63  
64  
65

283 within SIMToolbox (i.e., without the GUI), MATLAB must be installed. The functions were mainly  
284 developed with 64 bit MATLAB versions 2012b, 2014a, 2015a in Windows 7. When using SIMToolbox  
285 functions without the GUI, the MATLAB “Image Processing Toolbox” is required. SIMToolbox also  
286 requires the “MATLAB YAML” package to convert MATLAB objects to/from YAML file format. Note  
287 that this package is installed automatically when using the GUI.

#### 288 **Availability of data**

289 All raw and analyzed data is available in the *GigaScience* GigaDB database [52].

#### 290 **Abbreviations**

291 GFP: green fluorescent protein; GUI: graphical user interface; NA: numerical aperture; PSF: point spread  
292 function; PSD: power spectral density; PSDca, circularly averaged power spectral density; SBR: signal to  
293 background ratio; SIM: structured illumination microscopy; SNR: signal to noise ratio; WF: wide field.

#### 294 **Ethics approval and consent to participate**

295 Not applicable

#### 296 **Consent for publication**

297 Not applicable

#### 298 **Competing interests**

299 The authors declare that they have no competing interests.

#### 300 **Funding**

301 This work was supported by the National Institutes of Health grant number 1R15GM128166-01. This  
302 work was also supported by the UCCS center for the University of Colorado BioFrontiers Institute, by  
303 the Czech Science Foundation, and by Czech Technical University in Prague (grant number  
304 SGS18/141/OHK3/2T/13). T.L. acknowledges a SCIEX scholarship (project code 13.183). The funding  
305 sources had no involvement in study design; in the collection, analysis and interpretation of data; in the  
306 writing of the report; or in the decision to submit the article for publication. This material is based in part  
307 upon work supported by the National Science Foundation under Grant Number 1727033. Any opinions,

1  
2  
3  
4  
5  
6  
7  
8  
9  
10  
11  
12  
13  
14  
15  
16  
17  
18  
19  
20  
21  
22  
23  
24  
25  
26  
27  
28  
29  
30  
31  
32  
33  
34  
35  
36  
37  
38  
39  
40  
41  
42  
43  
44  
45  
46  
47  
48  
49  
50  
51  
52  
53  
54  
55  
56  
57  
58  
59  
60  
61  
62  
63  
64  
65

308 findings, and conclusions or recommendations expressed in this material are those of the authors and do  
309 not necessarily reflect the views of the National Science Foundation.

### 310 **Author Contributions**

311 TL: analyzed data, developed computer code

312 JP: analyzed data, developed computer code

313 KF: supervised research

314 KS: analyzed data

315 JB: acquired data

316 GH: conceived project, acquired data, analyzed data, supervised research, wrote the paper

### 317 **Acknowledgements**

318 The authors thank Dr. Donna Arndt-Jovin and Dr. Tomas Jovin of the Max Planck Institute for  
319 Biophysical Chemistry (Göttingen, Germany) for the A431 cells. The authors thank Viola Hausnerová  
320 and Christian Lanctôt of Charles University in Prague (Prague, Czech Republic), for the LAMP1-GFP  
321 cells. The authors thank Pavel Křížek, Zdeněk Švindrych, and Martin Ovesný for help with data  
322 acquisition, microscopy development, programming, and data analysis.

### 323 **References**

- 324 1. E. Betzig, G. H. Patterson, R. Sougrat, O. W. Lindwasser, S. Olenych, J. S. Bonifacino, M. W.  
325 Davidson, J. Lippincott-Schwartz, and H. F. Hess, "Imaging intracellular fluorescent proteins at  
326 nanometer resolution," *Science* **313**, 1642–5 (2006).
- 327 2. S. T. Hess, T. P. K. Girirajan, and M. D. Mason, "Ultra-high resolution imaging by fluorescence  
328 photoactivation localization microscopy," *Biophys. J.* **91**, 4258–4272 (2006).
- 329 3. M. J. Rust, M. Bates, and X. Zhuang, "Sub-diffraction-limit imaging by stochastic optical  
330 reconstruction microscopy (STORM)," *Nat. Methods* **3**, 793–795 (2006).
- 331 4. M. Heilemann, S. van de Linde, M. Schüttpelz, R. Kasper, B. Seefeldt, A. Mukherjee, P.  
332 Tinnefeld, and M. Sauer, "Subdiffraction-resolution fluorescence imaging with conventional

1  
2  
3  
4  
5  
6  
7  
8  
9  
10  
11  
12  
13  
14  
15  
16  
17  
18  
19  
20  
21  
22  
23  
24  
25  
26  
27  
28  
29  
30  
31  
32  
33  
34  
35  
36  
37  
38  
39  
40  
41  
42  
43  
44  
45  
46  
47  
48  
49  
50  
51  
52  
53  
54  
55  
56  
57  
58  
59  
60  
61  
62  
63  
64  
65

fluorescent probes," *Angew. Chemie Int. Ed.* **47**, 6172–6176 (2008).

334 5. T. Dertinger, R. Colyer, G. Iyer, S. Weiss, and J. Enderlein, "Fast, background-free, 3D super-  
335 resolution optical fluctuation imaging (SOFI)," *Proc. Natl. Acad. Sci. U. S. A.* **106**, 22287–22292  
336 (2009).

337 6. S. Geissbuehler, N. L. Bocchio, C. Dellagiacoma, C. Berclaz, M. Leutenegger, and T. Lasser,  
338 "Mapping molecular statistics with balanced super-resolution optical fluctuation imaging  
339 (bSOFI)," *Opt. Nanoscopy* **1**, 4 (2012).

340 7. S. W. Hell and J. Wichmann, "Breaking the diffraction resolution limit by stimulated emission:  
341 stimulated-emission-depletion fluorescence microscopy," *Opt. Lett.* **19**, 780 (1994).

342 8. R. Heintzmann and C. Cremer, "Laterally modulated excitation microscopy: improvement of  
343 resolution by using a diffraction grating," *Proc. SPIE* **3568**, 185–196 (1998).

344 9. M. G. L. Gustafsson, "Surpassing the lateral resolution limit by a factor of two using structured  
345 illumination microscopy," *J. Microsc.* **198**, 82–87 (2000).

346 10. M. A. A. Neil, R. Juškaitis, and T. Wilson, "Method of obtaining optical sectioning by using  
347 structured light in a conventional microscope," *Opt. Lett.* **22**, 1905–1907 (1997).

348 11. M. G. L. Gustafsson, L. Shao, P. M. Carlton, C. J. R. Wang, I. N. Golubovskaya, W. Z. Cande, D.  
349 A. Agard, and J. W. Sedat, "Three-dimensional resolution doubling in widefield fluorescence  
350 microscopy by structured illumination," *Biophys. J.* **94**, 4957–4970 (2008).

351 12. P. Kner, B. B. Chhun, E. R. Griffis, L. Winoto, and M. G. L. Gustafsson, "Super-resolution video  
352 microscopy of live cells by structured illumination," *Nat. Methods* **6**, 339–342 (2009).

353 13. L. M. Hirvonen, K. Wicker, O. Mandula, and R. Heintzmann, "Structured illumination  
354 microscopy of a living cell," *Eur. Biophys. J.* **38**, 807–812 (2009).

355 14. L. Shao, P. Kner, E. H. Rego, and M. G. L. Gustafsson, "Super-resolution 3D microscopy of live  
356 whole cells using structured illumination," *Nat. Methods* **8**, 1044–1046 (2011).

357 15. L. Schermelleh, P. M. Carlton, S. Haase, L. Shao, L. Winoto, P. Kner, B. Burke, M. C. Cardoso,

1  
2  
3  
4  
5  
6  
7  
8  
9  
10  
11  
12  
13  
14  
15  
16  
17  
18  
19  
20  
21  
22  
23  
24  
25  
26  
27  
28  
29  
30  
31  
32  
33  
34  
35  
36  
37  
38  
39  
40  
41  
42  
43  
44  
45  
46  
47  
48  
49  
50  
51  
52  
53  
54  
55  
56  
57  
58  
59  
60  
61  
62  
63  
64  
65

358 D. A. Agard, M. G. L. Gustafsson, H. Leonhardt, and J. W. Sedat, "Subdiffraction multicolor  
359 imaging of the nuclear periphery with 3D structured illumination microscopy," *Science* **320**,  
360 1332–1336 (2008).

361 16. R. Fiolka, L. Shao, E. H. Rego, M. W. Davidson, and M. G. L. Gustafsson, "Time-lapse two-color  
362 3D imaging of live cells with doubled resolution using structured illumination," *Proc. Natl. Acad.*  
363 *Sci. U. S. A.* **109**, 5311–5315 (2012).

364 17. A. G. York, S. H. Parekh, D. D. Nogare, R. S. Fischer, K. Temprine, M. Mione, A. B. Chitnis, C.  
365 A. Combs, and H. Shroff, "Resolution doubling in live, multicellular organisms via multifocal  
366 structured illumination microscopy," *Nat. Methods* **9**, 749–754 (2012).

367 18. M. Ingaramo, A. G. York, P. Wawrzusin, O. Milberg, A. Hong, R. Weigert, H. Shroff, and G. H.  
368 Patterson, "Two-photon excitation improves multifocal structured illumination microscopy in  
369 thick scattering tissue," *Proc. Natl. Acad. Sci. U. S. A.* **111**, 5254–9 (2014).

370 19. A. G. York, P. Chandris, D. D. Nogare, J. Head, P. Wawrzusin, R. S. Fischer, A. Chitnis, and H.  
371 Shroff, "Instant super-resolution imaging in live cells and embryos via analog image processing.,"  
372 *Nat. Methods* **10**, 1122–6 (2013).

373 20. M. Schropp and R. Uhl, "Two-dimensional structured illumination microscopy," *J. Microsc.* **256**,  
374 23–36 (2014).

375 21. M. Schropp, C. Seebacher, and R. Uhl, "XL-SIM: Extending Superresolution into Deeper  
376 Layers," *Photonics* **4**, 33 (2017).

377 22. T. A. Planchon, L. Gao, D. E. Milkie, M. W. Davidson, J. A. Galbraith, G. Catherine, C. G.  
378 Galbraith, and E. Betzig, "Rapid three-dimensional isotropic imaging of living cells using Bessel  
379 beam plane illumination," *Nat. Methods* **8**, 417–423 (2011).

380 23. P. J. Keller, A. D. Schmidt, A. Santella, K. Khairy, Z. Bao, J. Wittbrodt, and E. H. K. Stelzer,  
381 "Fast, high-contrast imaging of animal development with scanned light sheet-based structured-  
382 illumination microscopy," *Nat Meth* **7**, 637–642 (2010).

1  
2  
3  
4  
5  
6  
7  
8  
9  
10  
11  
12  
13  
14  
15  
16  
17  
18  
19  
20  
21  
22  
23  
24  
25  
26  
27  
28  
29  
30  
31  
32  
33  
34  
35  
36  
37  
38  
39  
40  
41  
42  
43  
44  
45  
46  
47  
48  
49  
50  
51  
52  
53  
54  
55  
56  
57  
58  
59  
60  
61  
62  
63  
64  
65

383 24. L. Gao, L. Shao, C. C. D. Higgins, J. S. J. Poulton, M. Peifer, M. W. Davidson, X. Wu, B.  
384 Goldstein, and E. Betzig, "Noninvasive imaging beyond the diffraction limit of 3D dynamics in  
385 thickly fluorescent specimens," *Cell* **151**, 1370–1385 (2012).

386 25. B.-C. Chen, W. R. Legant, K. Wang, L. Shao, D. E. Milkie, M. W. Davidson, C. Janetopoulos, X.  
387 S. Wu, J. A. Hammer, Z. Liu, B. P. English, Y. Mimori-Kiyosue, D. P. Romero, A. T. Ritter, J.  
388 Lippincott-Schwartz, L. Fritz-Laylin, R. D. Mullins, D. M. Mitchell, J. N. Bembenek, A.-C.  
389 Reymann, R. Bohme, S. W. Grill, J. T. Wang, G. Seydoux, U. S. Tulu, D. P. Kiehart, and E.  
390 Betzig, "Lattice light-sheet microscopy: Imaging molecules to embryos at high spatiotemporal  
391 resolution," *Science* **346**, 1257998 (2014).

392 26. D. Li, L. Shao, B.-C. Chen, X. Zhang, M. Zhang, B. Moses, D. E. Milkie, J. R. Beach, J. A.  
393 Hammer, M. Pasham, T. Kirchhausen, M. A. Baird, M. W. Davidson, P. Xu, and E. Betzig,  
394 "Extended-resolution structured illumination imaging of endocytic and cytoskeletal dynamics,"  
395 *Science* **349**, aab3500 (2015).

396 27. S. Dong, P. Nanda, R. Shiradkar, K. Guo, and G. Zheng, "High-resolution fluorescence imaging  
397 via pattern-illuminated Fourier ptychography.," *Opt. Express* **22**, 20856–70 (2014).

398 28. F. Orieux, E. Sepulveda, V. Lorient, B. Dubertret, and J.-C. Olivo-Marin, "Bayesian estimation  
399 for optimized structured illumination microscopy.," *IEEE Trans. Image Process.* **21**, 601–14  
400 (2012).

401 29. T. Lukeš, G. M. G. M. Hagen, P. Křížek, Z. Švindrych, K. Fliegel, M. Klíma, P. Křížek, Z.  
402 Švindrych, K. Fliegel, and M. Klíma, "Comparison of image reconstruction methods for  
403 structured illumination microscopy," *Proc. SPIE* **9129**, 91293J (2014).

404 30. T. Lukeš, P. Křížek, Z. Švindrych, J. Benda, M. Ovesný, K. Fliegel, M. Klíma, and G. M. Hagen,  
405 "Three-dimensional super-resolution structured illumination microscopy with maximum a  
406 posteriori probability image estimation," *Opt. Express* **22**, 29805–17 (2014).

407 31. E. Mudry, K. Belkebir, J. Girard, J. Savatier, E. Le Moal, C. Nicoletti, M. Allain, and A.

1  
2  
3  
4  
5  
6  
7  
8  
9  
10  
11  
12  
13  
14  
15  
16  
17  
18  
19  
20  
21  
22  
23  
24  
25  
26  
27  
28  
29  
30  
31  
32  
33  
34  
35  
36  
37  
38  
39  
40  
41  
42  
43  
44  
45  
46  
47  
48  
49  
50  
51  
52  
53  
54  
55  
56  
57  
58  
59  
60  
61  
62  
63  
64  
65

408 Sentenac, "Structured illumination microscopy using unknown speckle patterns," *Nat. Photonics*  
409 **6**, 312–315 (2012).

410 32. X. Huang, J. Fan, L. Li, H. Liu, R. Wu, Y. Wu, L. Wei, H. Mao, A. Lal, P. Xi, L. Tang, Y. Zhang,  
411 Y. Liu, S. Tan, and L. Chen, "Fast, long-term, super-resolution imaging with Hessian structured  
412 illumination microscopy," *Nat. Biotechnol.* (2018).

413 33. V. Perez, B. J. Chang, and E. H. K. Stelzer, "Optimal 2D-SIM reconstruction by two filtering  
414 steps with Richardson-Lucy deconvolution," *Sci. Rep.* **6**, 37149 (2016).

415 34. K. Chu, P. J. McMillan, Z. J. Smith, J. Yin, J. Atkins, P. Goodwin, S. Wachsmann-Hogiu, and S.  
416 Lane, "Image reconstruction for structured-illumination microscopy with low signal level," *Opt.*  
417 *Express* **22**, 8687 (2014).

418 35. N. Chakrova, B. Rieger, and S. Stallinga, "Deconvolution methods for structured illumination  
419 microscopy," *J. Opt. Soc. Am. A* **33**, B12 (2016).

420 36. P. Křížek, T. Lukeš, M. Ovesný, K. Fliegel, and G. M. Hagen, "SIMToolbox: A MATLAB  
421 toolbox for structured illumination fluorescence microscopy," *Bioinformatics* **32**, 318–320 (2015).

422 37. P. Křížek, I. Raška, and G. M. Hagen, "Flexible structured illumination microscope with a  
423 programmable illumination array," *Opt. Express* **20**, 24585 (2012).

424 38. G. M. Hagen, W. Caarls, M. Thomas, A. Hill, K. A. Lidke, B. Rieger, C. Fritsch, B. van Geest, T.  
425 M. Jovin, and D. J. Arndt-Jovin, "Biological applications of an LCoS-based programmable array  
426 microscope," *Proc. SPIE* **64410S**, 1–12 (2007).

427 39. C. A. Werley, M.-P. Chien, and A. E. Cohen, "An ultrawidefield microscope for high-speed  
428 fluorescence imaging and targeted optogenetic stimulation," *Biomed. Opt. Express* **8**, 5794  
429 (2017).

430 40. D. Dan, M. Lei, B. Yao, W. Wang, M. Winterhalder, A. Zumbusch, Y. Qi, L. Xia, S. Yan, Y.  
431 Yang, P. Gao, T. Ye, and W. Zhao, "DMD-based LED-illumination super-resolution and optical  
432 sectioning microscopy.," *Sci. Rep.* **3**, 1116 (2013).

1  
2  
3  
4  
5  
6  
7  
8  
9  
10  
11  
12  
13  
14  
15  
16  
17  
18  
19  
20  
21  
22  
23  
24  
25  
26  
27  
28  
29  
30  
31  
32  
33  
34  
35  
36  
37  
38  
39  
40  
41  
42  
43  
44  
45  
46  
47  
48  
49  
50  
51  
52  
53  
54  
55  
56  
57  
58  
59  
60  
61  
62  
63  
64  
65

433 41. P. Křížek and G. M. Hagen, "Spatial light modulators in fluorescence microscopy," in  
434 *Microscopy: Science, Technology, Applications and Education*, A. Méndez-Vilas, ed., 4th ed.  
435 (Formatex, 2010), Vol. 2, pp. 1366–1377.

436 42. G. M. Hagen, W. Caarls, K. A. Lidke, A. H. B. De Vries, C. Fritsch, B. G. Barisas, D. J. Arndt-  
437 Jovin, and T. M. Jovin, "Fluorescence recovery after photobleaching and photoconversion in  
438 multiple arbitrary regions of interest using a programmable array microscope," *Microsc. Res.*  
439 *Tech.* **72**, 431–440 (2009).

440 43. L. Song, H.-W. Lu-Walther, R. Förster, A. Jost, M. Kielhorn, J. Zhou, and R. Heintzmann, "Fast  
441 structured illumination microscopy using rolling shutter cameras," *Meas. Sci. Technol.* **27**,  
442 055401 (2016).

443 44. Z. Cvačková, M. Mašata, D. Staněk, H. Fidlerová, and I. Raška, "Chromatin position in human  
444 HepG2 cells: although being non-random, significantly changed in daughter cells.," *J. Struct.*  
445 *Biol.* **165**, 107–17 (2009).

446 45. L. J. Young, F. Ströhl, and C. F. Kaminski, "A Guide to Structured Illumination TIRF  
447 Microscopy at High Speed with Multiple Colors," *J. Vis. Exp.* e53988–e53988 (2016).

448 46. R. Förster, H.-W. Lu-Walther, A. Jost, M. Kielhorn, K. Wicker, and R. Heintzmann, "Simple  
449 structured illumination microscope setup with high acquisition speed by using a spatial light  
450 modulator," *Opt. Express* **22**, 20663–77 (2014).

451 47. H.-W. Lu-Walther, M. Kielhorn, R. Förster, A. Jost, K. Wicker, and R. Heintzmann, "fastSIM: a  
452 practical implementation of fast structured illumination microscopy," *Methods Appl. Fluoresc.* **3**,  
453 014001 (2015).

454 48. T. C. Schlichenmeyer, M. Wang, K. N. Elfer, and J. Q. Brown, "Video-rate structured  
455 illumination microscopy for high-throughput imaging of large tissue areas.," *Biomed. Opt.*  
456 *Express* **5**, 366–77 (2014).

457 49. S. R. Kantelhardt, W. Caarls, A. H. B. de Vries, G. M. Hagen, T. M. Jovin, W. Schulz-Schaeffer,

1  
2  
3  
4  
5  
6  
7  
8  
9  
10  
11  
12  
13  
14  
15  
16  
17  
18  
19  
20  
21  
22  
23  
24  
25  
26  
27  
28  
29  
30  
31  
32  
33  
34  
35  
36  
37  
38  
39  
40  
41  
42  
43  
44  
45  
46  
47  
48  
49  
50  
51  
52  
53  
54  
55  
56  
57  
58  
59  
60  
61  
62  
63  
64  
65

458 V. Rohde, A. Giese, and D. J. Arndt-Jovin, "Specific visualization of glioma cells in living low-  
459 grade tumor tissue," *PLoS One* **5**, 1–11 (2010).

460 50. J. Pospíšil, K. Fliegel, and M. Klíma, "Assessing resolution in live cell structured illumination  
461 microscopy," in *Proceedings of SPIE - The International Society for Optical Engineering*, P. Páta  
462 and K. Fliegel, eds. (SPIE, 2017), Vol. 10603, p. 39.

463 51. A. K. Agarwal, N. Srinivasan, R. Godbole, S. K. More, S. Budnar, R. P. Gude, and R. D.  
464 Kalraiya, "Role of tumor cell surface lysosome-associated membrane protein-1 (LAMP1) and its  
465 associated carbohydrates in lung metastasis.," *J. Cancer Res. Clin. Oncol.* **141**, 1563–74 (2015).

466 52. Pospíšil J; Lukeš T; Bendesky J; Fliegel K; Spendier K; Hagen GM (2018): Supporting data for  
467 "Imaging tissues and cells beyond the diffraction limit with structured illumination microscopy  
468 and Bayesian image reconstruction" GigaScience Database. <http://dx.doi.org/10.5524/100514>

469 53. F. Huang, T. M. P. Hartwich, F. E. Rivera-Molina, Y. Lin, W. C. Duim, J. J. Long, P. D. Uchil, J.  
470 R. Myers, M. A. Baird, W. Mothes, M. W. Davidson, D. Toomre, and J. Bewersdorf, "Video-rate  
471 nanoscopy using sCMOS camera-specific single-molecule localization algorithms.," *Nat.*  
472 *Methods* **10**, 1–9 (2013).

473 54. J. W. Goodman, "Frequency Analysis of Optical Imaging Systems," in *Introduction to Fourier*  
474 *Optics*, 2nd ed. (McGraw-Hill Int., 1968), pp. 126–171.

475 55. M. Geissbuehler and T. Lasser, "How to display data by color schemes compatible with red-green  
476 color perception deficiencies.," *Opt. Express* **21**, 9862–74 (2013).

## 477 **FIGURE CAPTIONS**

478 **Figure 1:** Structured illumination microscope setup, which we used with different microscope bodies and  
479 cameras. See text and table 2 for details.

480 **Figure 2:** Measurements of the spatial resolution on a sample of fluorescent beads. Cross-sections of the  
481 PSF are obtained by averaging measurements over 50 beads along lateral and axial directions.



1  
2  
3  
4  
5  
6  
7  
8  
9  
10  
11  
12  
13  
14  
15  
16  
17  
18  
19  
20  
21  
22  
23  
24  
25  
26  
27  
28  
29  
30  
31  
32  
33  
34  
35  
36  
37  
38  
39  
40  
41  
42  
43  
44  
45  
46  
47  
48  
49  
50  
51  
52  
53  
54  
55  
56  
57  
58  
59  
60  
61  
62  
63  
64  
65

**Figure 3:** Resolution analysis and normalized power spectral density (PSD) measured on a selected image from the data in Fig. 5. The results indicate a circularly-averaged PSD lateral spatial resolution of 294 nm for WF, and 141 nm for MAP-SIM, in approximate agreement with the analysis in Fig. 4(d-f).

**Figure 4:** Imaging live cells beyond the diffraction limit with MAP-SIM. U2-OS cells expressing LAMP1-GFP were imaged using the LCOS-based SIM system. Subsequent processing using OS-SIM or MAP-SIM methods. (a) WF, (b) OS-SIM, (c) MAP-SIM, (d) FFT of WF, (e) FFT of OS-SIM, (f) FFT of MAP-SIM. The images were individually scaled for presentation. The dotted circular lines indicate the approximate resolution achieved in each image according to analysis of the FFT. The full image sequence is available at [http://mmtg.fel.cvut.cz/mapsimlive\\_suppl/](http://mmtg.fel.cvut.cz/mapsimlive_suppl/).

**Figure 5:** Imaging live cells beyond the diffraction limit with SIM. A431 cells labeled with DiI-C16 were imaged using the LCOS-based SIM system. Subsequent processing using SR-SIM or MAP-SIM methods. (a) WF, (c) SR-SIM, (e) MAP-SIM. (b), (d), and (f) each show a zoom-in of the region indicated in (a). (g) shows the SIM illumination pattern in one of the four angles used. (h) shows a FFT of the image in (g). The images were individually scaled for visualization purposes. Each is a maximum intensity projection of 3 Z positions (spacing 400 nm (except for g and h which show a single Z-position)).

**Figure 6:** Imaging animal tissues using the LCOS-based SIM system and subsequent processing using OS-SIM or MAP-SIM methods. Seminiferous tubule of the rabbit stained with hematoxylin and eosin. (a) WF, (c) OS-SIM, (e) MAP-SIM. (b), (d), and (f) each show a zoom-in of the region indicated in (a). (g) shows the SIM illumination pattern in one of the four angles used. (h) MAP-SIM depth-coded using the lookup table isolum [55]. The images were individually scaled for visualization purposes. Each is a maximum intensity projection of 31 Z-positions (spacing 300 nm (except for (a, b, g) which show 1 Z-position)).

**Figure 7:** SIM imaging of fixed HEP-G2 cells expressing Dendra2-H4 (nucleus) and labeled with Atto-532 phalloidin. (a) WF, (c) SR-SIM, (e) MAP-SIM. (b), (d), and (f) each show a zoom-in of the region

1  
2  
3  
4  
5  
6  
7  
8  
9  
10  
11  
12  
13  
14  
15  
16  
17  
18  
19  
20  
21  
22  
23  
24  
25  
26  
27  
28  
29  
30  
31  
32  
33  
34  
35  
36  
37  
38  
39  
40  
41  
42  
43  
44  
45  
46  
47  
48  
49  
50  
51  
52  
53  
54  
55  
56  
57  
58  
59  
60  
61  
62  
63  
64  
65

507 indicated in (a). (g) shows the SIM illumination pattern in one of the four angles used. (h) shows a FFT  
508 of the image in (g). The images were individually scaled for visualization purposes. Each is a maximum  
509 intensity projection of 22 Z-positions (spacing 200 nm (except for a, b, g and h which show 1 Z-  
510 position).

511 **Figure 8:** 2D SIM imaging of fixed BPAE cells labeled with Alexa 488-phalloidin (actin) and  
512 mitotracker CMXRos (mitochondria). (a) WF, (b) MAPSIM.

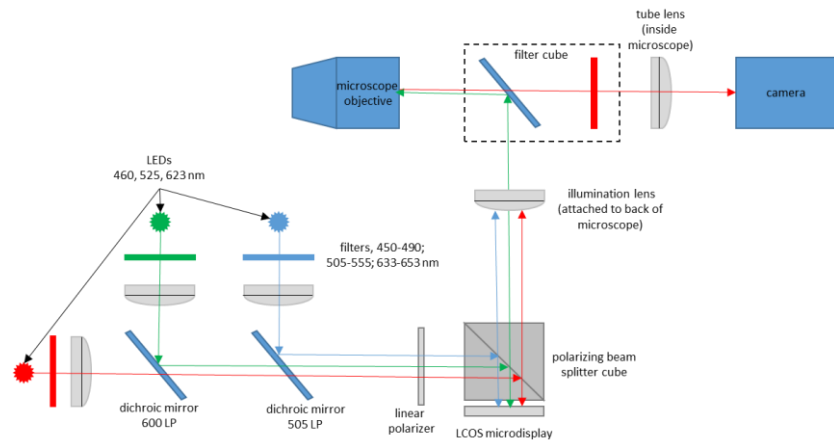

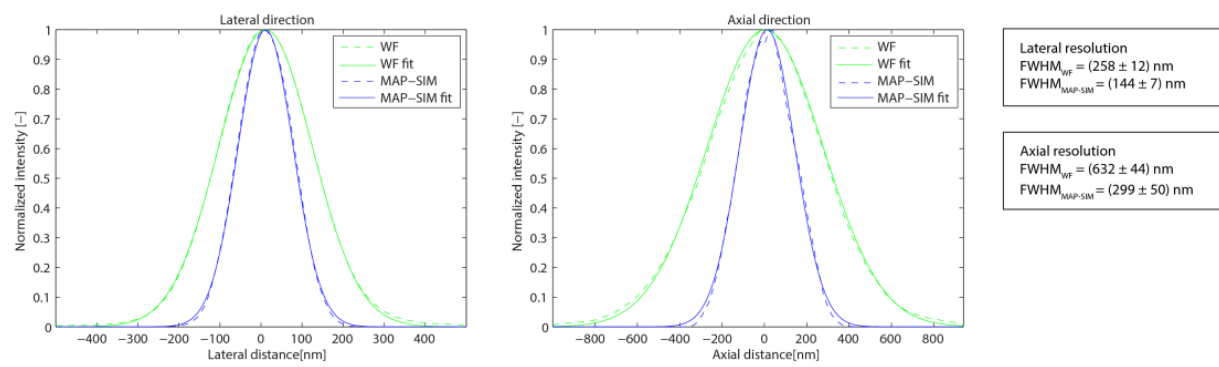

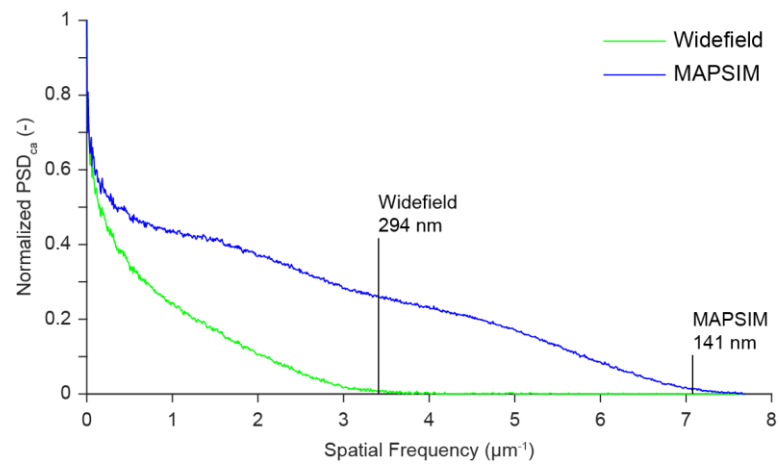

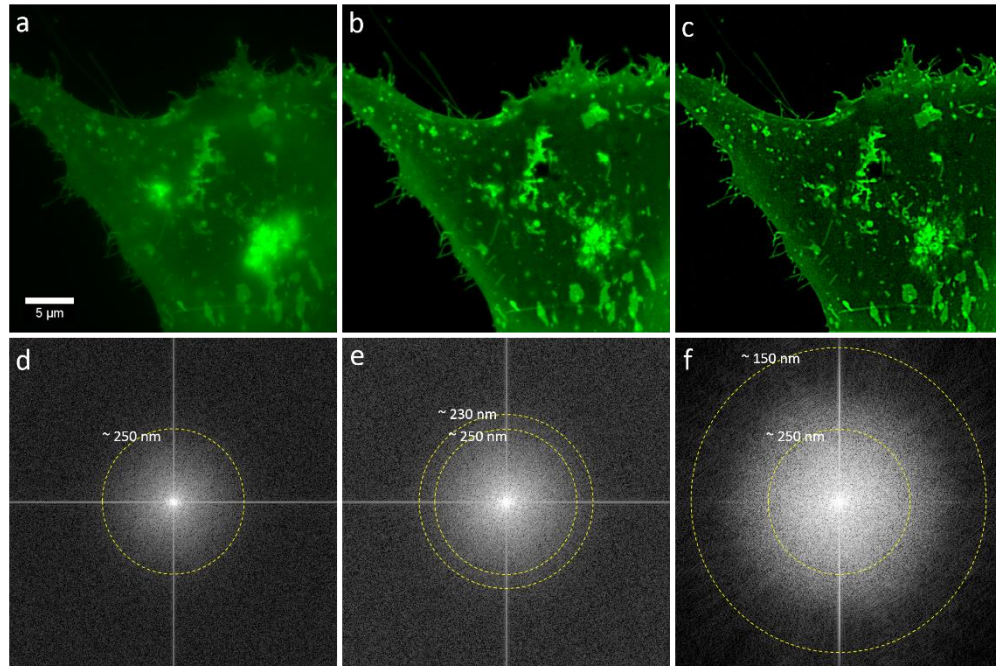

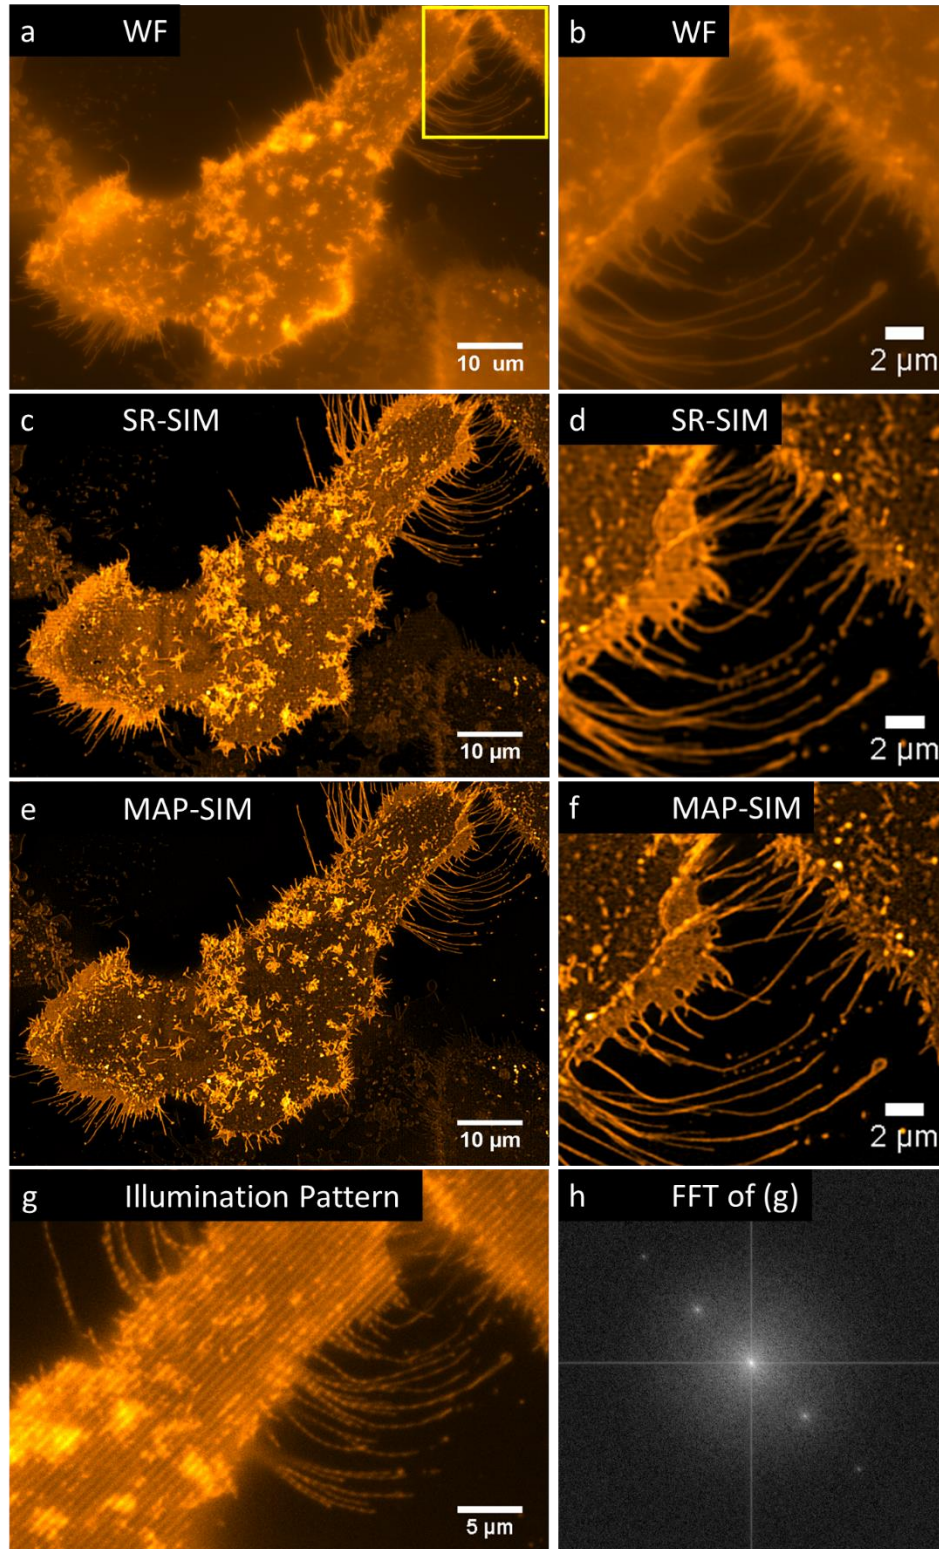



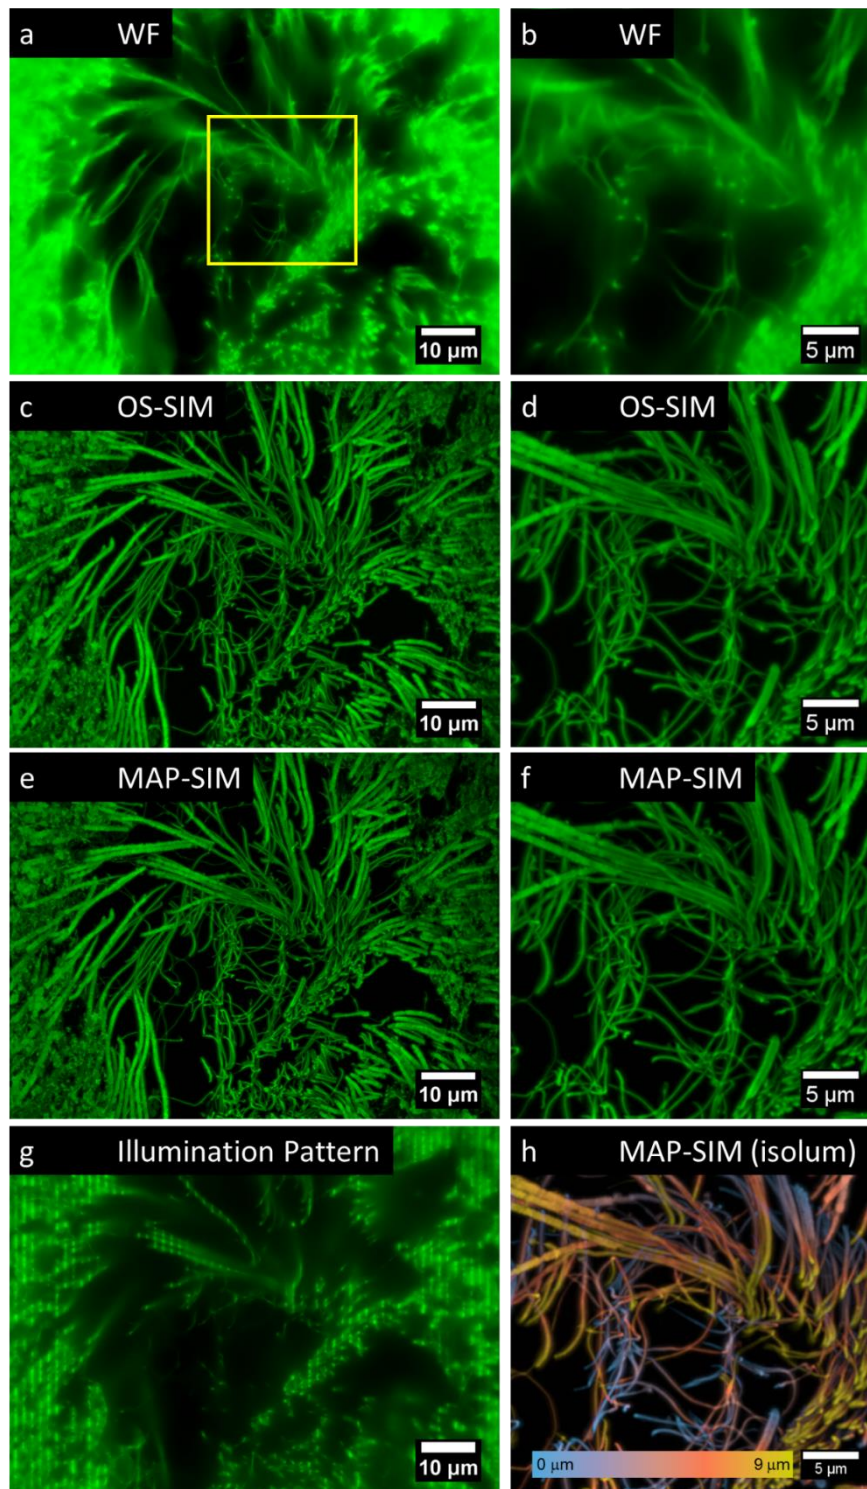



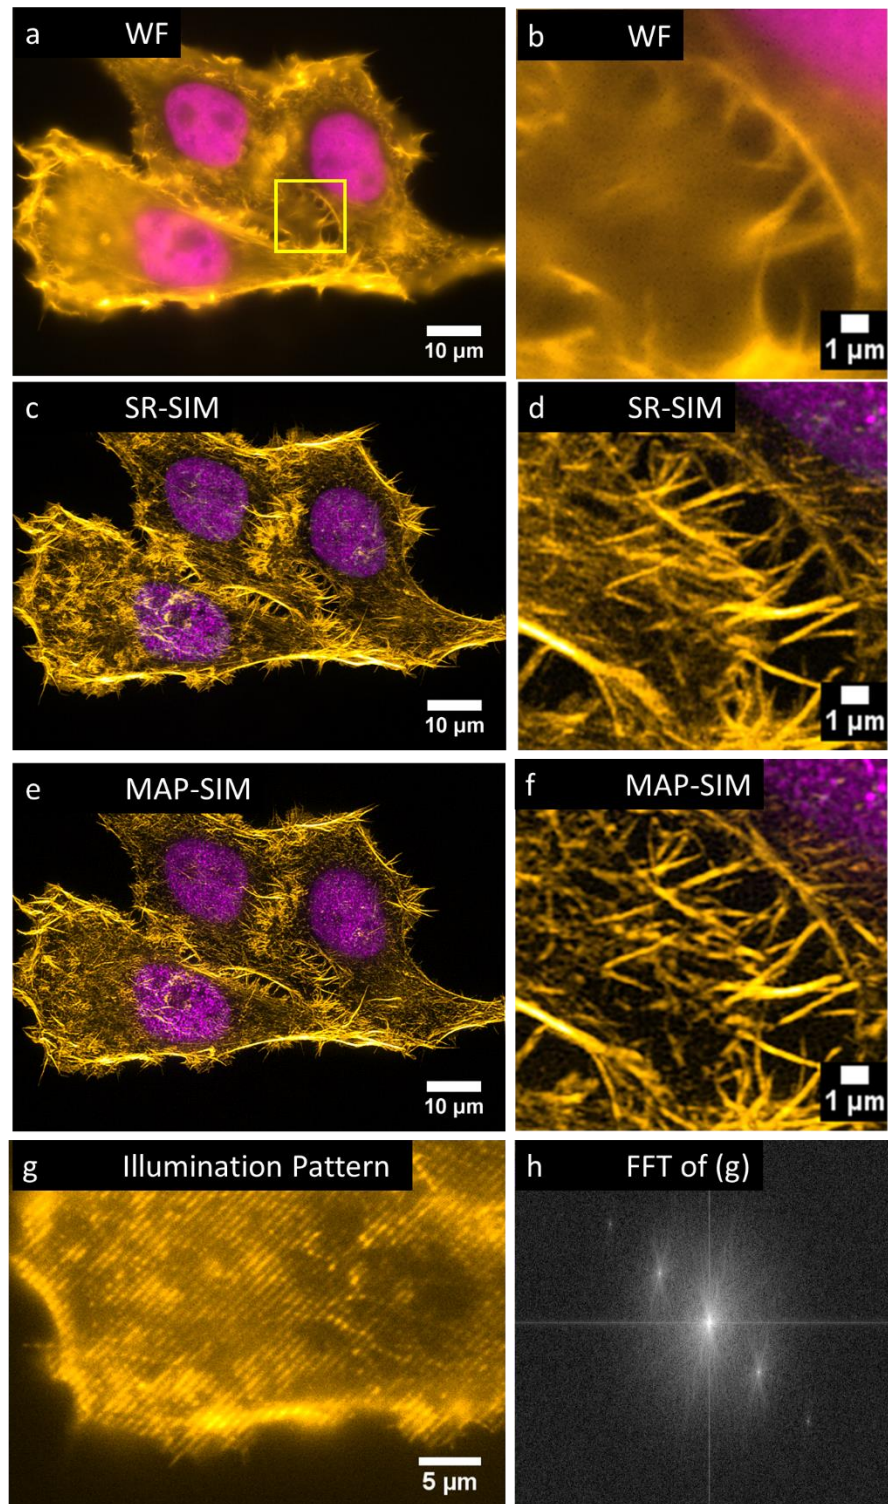

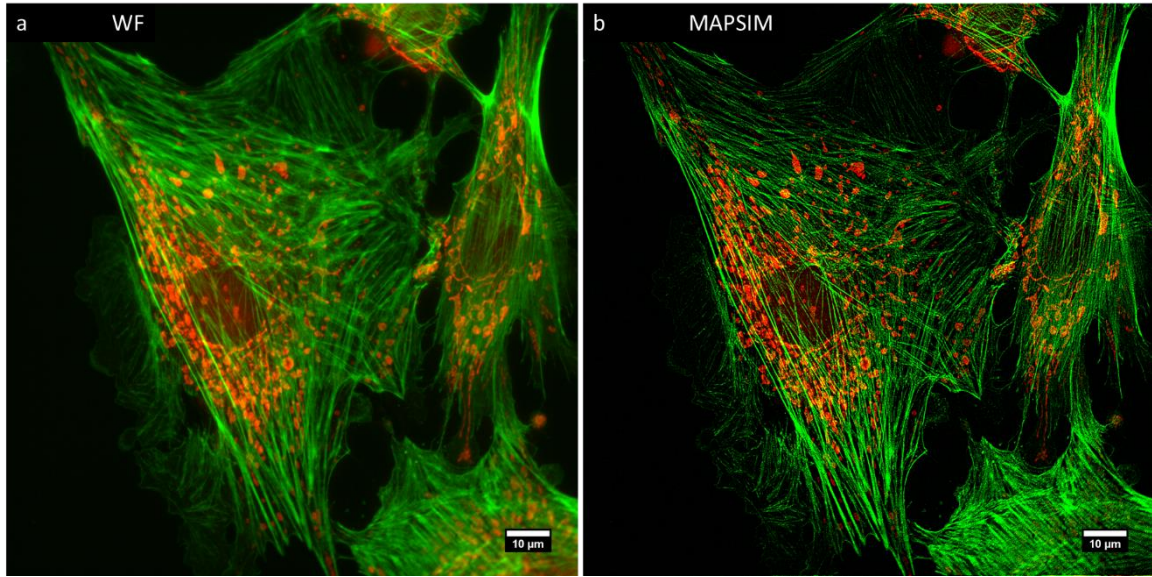

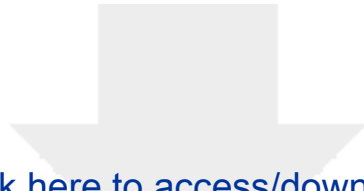

[Click here to access/download](#)

**Supplementary Material**

Hagen-SIM Supplementary-resubmit.docx

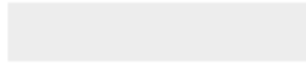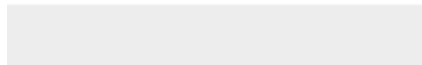

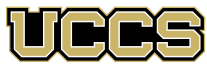

University of Colorado  
Colorado Springs

**Dr. Guy M. Hagen**

Biofrontiers

1420 Austin Bluffs Pkwy.

Colorado Springs, CO 80918

Tel. 719-255-3692

ghagen@uccs.edu

Dear Editor:

We would like to resubmit our manuscript entitled “Imaging tissues and cells beyond the diffraction limit with structured illumination microscopy and Bayesian image reconstruction” for consideration in *GigaScience* as a data note.

We would like to thank the referees for their very positive reviews of the paper. Reviewer 1 had a minor point of concern:

“One minor point the authors may want to address is the difference between coherent interference illumination and the incoherent pattern illumination employed in the manuscript. It seems that interference illumination can generate a sin pattern with highest contrast at cutoff frequency while incoherent pattern illumination may suffer from the gradually cutoff of the incoherent OTF.”

We thank the reviewer for this comment. The reviewer is correct about this, and we have written some comments and added a new reference in the discussion which should clear up this matter. The modified paragraph now reads:

“There are several other advantages to the use incoherent illumination in SIM, including removing the need for a pupil plane mask to block unwanted diffraction orders. Also, incoherent imaging of a microdisplay for pattern formation means that the pattern spatial frequency in the sample plane does not depend on the wavelength of the light which is used. On the other hand, in incoherent illumination SIM such as we used here, the contrast of the illumination pattern decreases with increasing spatial frequency according to the incoherent optical transfer function [53]. In coherent illumination SIM [8,9,11], the coherent optical transfer function applies [53], and so the pattern contrast does not decrease with increasing spatial frequency. This means that coherent illumination SIM can more efficiently mix high resolution information from outside the frequency limit into the detection passband of the microscope, thereby potentially achieving better resolution than what we achieved in this work. We achieved a lateral resolution enhancement factor of  $\sim 1.8$  (Fig. 2), whereas a factor of 2.0 is expected for coherent illumination SIM.”

In addition to this, we have fixed a few typographical errors.

We hope that the paper will now be acceptable for publication.

Sincerely,

A handwritten signature in blue ink that reads 'Guy Hagen'.

Guy M. Hagen
